# Supplementary material for: Formal [4 + 1] cycloaddition of in situ generated 1,2-diaza-1,3-dienes with diazo esters: facile approaches to dihydropyrazoles containing a quaternary center
Source: Royal Society of Chemistry journal article supplement (doi:10.1039/c8ra08909d), 2019-01-01
Supplement: c8ra08909d1.pdf [file c8ra08909d1.pdf]

## Supporting Information

### **Formal [4 + 1] Cycloaddition of in Situ Generated 1,2-Diaza-1,3-dienes with Diazo Esters: Facile Approaches to Dihydropyrazoles Containing a Quaternary Center**

Bo Chen, Wen-Dao Chu\* and Quan-Zhong Liu\*

Chemical Synthesis and Pollution Control Key Laboratory of Sichuan Province, College of Chemistry and Chemical Engineering, China West Normal University, Nanchong 637002, P. R. China.

[chuwendaonpo@126.com](mailto:chuwendaonpo@126.com); [quanzhongliu@cwnu.edu.cn](mailto:quanzhongliu@cwnu.edu.cn);

#### **CONTENTS**

|                                                                  |     |
|------------------------------------------------------------------|-----|
| 1) General.....                                                  | S2  |
| 2) General preparation procedure for hydrazones .....            | S2  |
| 3) General preparation procedure for the diazo substrates .....  | S2  |
| 4) Preparation of the ligand.....                                | S3  |
| 5) General Procedure for the Synthesis of Dihydropyrazoles. .... | S4  |
| 6) Characterization data for the products.....                   | S5  |
| 7) X-ray crystallographic data of 3ha .....                      | S10 |
| 8) References .....                                              | S11 |
| 9) Copies of NMR spectra data.....                               | S12 |

## 1) General

All the reactions were performed under argon atmosphere in a 10 mL Schlenk tube. All solvents were distilled prior to use.  $\text{CH}_2\text{Cl}_2$ ,  $\text{CHCl}_3$  and  $\text{CH}_3\text{CN}$  were dried over  $\text{CaH}_2$ . Tetrahydrofuran and diethylether were distilled from sodium-benzophenone. For chromatography, 300-400 mesh silica gel (Qingdao, China) was employed.  $^1\text{H}$  NMR and  $^{13}\text{C}$  NMR spectra were recorded on Bruker ARX 400 spectrometer in  $\text{CDCl}_3$  solution or DMSO solution and the chemical shifts were reported in parts per million ( $\delta$ ) relative to internal standard TMS (0 ppm). Coupling constants ( $J$ ) are reported in Hz and refer to apparent peak multiplications. IR spectra were recorded on Nicolet iS10 in wave numbers,  $\text{cm}^{-1}$ . High resolution mass spectra were obtained on Bruker Daltonics micrOTOF-Q II spectrometer in ESI mode. Unless otherwise noted, materials obtained from commercial suppliers were used without further purification.

## 2) General preparation procedure for hydrazones

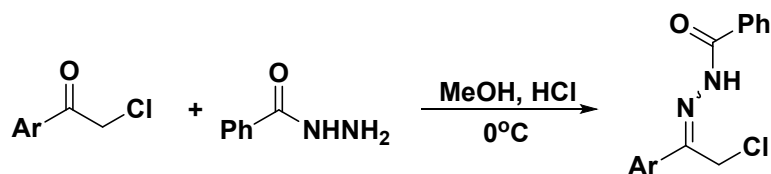

The hydrazone compounds were obtained according to the literature procedure.<sup>1a</sup> To a stirred solution of  $\alpha$ -chloro carbonyl compound (10 mmol, 1.0 eq.) in methanol (10 mL), the benzhydrazide (15 mmol, 1.5 eq.) and HCl (conc., 0.25 mL) was added at 0 °C. The mixture was stirred at the same temperature for 3 h and filtered then washed with  $\text{Et}_2\text{O}$  (10 mL). The crude product was then recrystallized from MeOH. Compound **1** was obtained as a white solid.

The  $\alpha$ -halo carbonyl compound were prepared according to the literature procedures<sup>[1b-e]</sup>.

## 3) General preparation procedure for the diazo substrates

### Benzyl 2-methyl-3-oxobutanoate(2a)<sup>2a</sup>

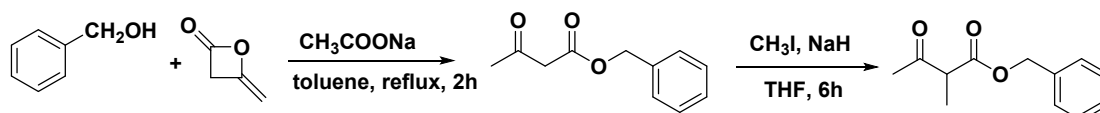

To a stirred solution of phenylmethanol (9.56 mL, 92.47 mmol, 1.0 equiv.) and CH<sub>3</sub>COONa (1.26 g, 9.25 mmol, 0.1 equiv.) in toluene (50 mL) was added diketene (7.80 mL, 101.72 mmol, 1.1 equiv.) at 60 °C, and the mixture was stirred at 130 °C for 2 h. The reaction mixture was quenched with saturated aqueous NaHCO<sub>3</sub> solution (45 mL), extracted with CH<sub>2</sub>Cl<sub>2</sub>, the combined organic layer was washed with brine (45 mL). The crude product of benzyl 3-oxobutanoate was dried over Na<sub>2</sub>SO<sub>4</sub> and evaporated. The residue was purified by silica gel column chromatography (petroleum ether/ethyl acetate = 30:1, V/V) to afford the desired product in 85% yield as a yellow oil.

To a stirred suspension of NaH (1.98 g, 82.5 mmol, 1.05 equiv.) in THF (100 mL) at 0 °C was added benzyl 3-oxobutanoate (15.1 g, 78.6 mmol, 1.0 equiv.) and the mixture was stirred for 5 min. MeI (5.14 mL, 82.5 mmol, 1.05 equiv.) was added slowly at 0 °C and the solution was stirred for 1 h at 0 °C to RT. The reaction mixture was quenched with NH<sub>4</sub>Cl aq. and the organic layer was separated and the aqueous layer was extracted with Et<sub>2</sub>O. The organic layer was dried over Na<sub>2</sub>SO<sub>4</sub> and the solvent was evaporated. Purification was performed by column chromatography of the crude product to give benzyl 2-methyl-3-oxobutanoate as yellow oil (8.92 g, 55 %).

#### Benzyl 2-diazopropanoate<sup>2a</sup>

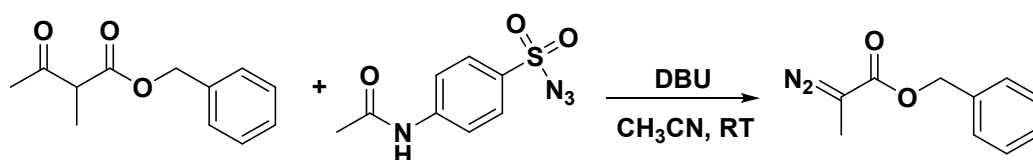

To a stirred suspension of benzyl 3-oxobutanoate (3.85 g, 18.65 mmol, 1 equiv.) in CH<sub>3</sub>CN (100 mL) was added 4-acetoamidobenzenesulfonyl azide (6.72 g, 27.97 mmol, 1.5 equiv.) under argon atmosphere. The mixture was cooled down to 0 °C, and added DBU (4.20 mL, 27.97 mmol, 1.5 equiv.). After stirring overnight at 0 °C to RT, the reaction mixture was quenched with H<sub>2</sub>O and extracted with Et<sub>2</sub>O. The organic phase was dried over Na<sub>2</sub>SO<sub>4</sub> and evaporated to give crude product. Purification was performed by column chromatography (petroleum ether/ethyl acetate = 50:1, V/V) to give Benzyl 2-diazopropanoate as yellow oil (2.0 g, 57 %).

The diazo substrates 2b<sup>2b</sup> and 2c<sup>2b</sup> were prepared according to the literature procedures.

#### 4) Preparation of the ligand(L6)

##### Dimethylmalonyl chloride<sup>3a</sup>

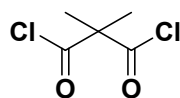

To a solution of 10.0 g dimethylmalonic acid (75.7 mmol) and 0.76 mL dimethyl formamide (9.84 mmol) in 82 mL dichloromethane was added 28.82 g oxalyl chloride (0.227 mol) at 0 °C using a dropping funnel within 1.5 h. The mixture was allowed to warm to room temperature and was stirred for 18 h. The solvent was removed under reduced pressure and obtained the crude product for the next steps.

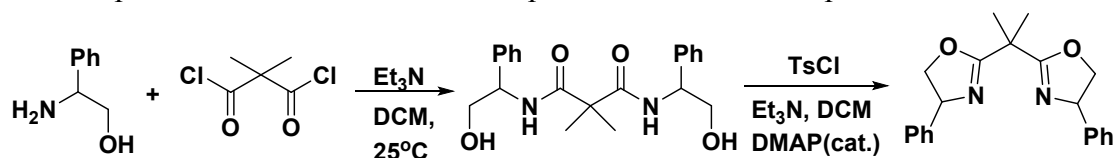

According to the reported procedure<sup>3b</sup>, in a three-necked round-bottom flask a solution amino alcohol (45.4 mmol, 2 equiv.) was taken in DCM. The solution was cooled to 0 °C and triethyl amine (113.5 mmol, 5 equiv.) was added to the mixture. Next a solution of dimethylmalonyl dichloride (22.7 mmol, 1equiv) in DCM was added dropwise to the flask over 15 minutes. Ice bath was removed after 20 minutes and stirred for extra 35 minutes at room temperature. The reaction mixture was washed with 1N HCl and then NaHCO<sub>3</sub>. The combined organic layer was dried over Na<sub>2</sub>SO<sub>4</sub> and the organic layer was concentrated in vacuo. The resultant residue was purified by coloum chromatography on silica gel. Pure diamide was used for further reaction. Diamide (6.35 mmol) and 4-(dimethylamino) pyridine (28.26 mmol) was suspended in DCM and triethylamine (28.26 mmol) was added to the mixture. Next *p*-toluenesulfonyl chloride (12.82 mmol) in DCM was added at 25 °C through cannula. The whole solution was stirred at 27 h. The solution was washed with NH<sub>4</sub>Cl and then NaHCO<sub>3</sub>. The resultant solution was concentrated by vacuo and purified by silica gel column chromatography to afford the desired bisoxazoline ligand **L6** as yellow liquid.

#### 5) General Procedure for the Synthesis of Dihydropyrazoles.

In an oven dried 10 mL Schlenk tube equipped with a stirring bar, CuCl<sub>2</sub> (1.4 mg, 0.01 mmol, 10 mol%), ligand **L6** (3.7 mg, 0.011 mmol, 11 mol%) were added into CH<sub>2</sub>Cl<sub>2</sub> (1.0 mL) under argon atmosphere. The mixture was stirred for one hour at

room temperature. Then the N-acyl hydrazone **1** (0.1 mmol), diazo ester **2** (0.5 mmol), and Na<sub>2</sub>CO<sub>3</sub> (0.5 mmol) were added to the tube under argon atmosphere. The reaction mixture was stirred at 40 °C for the indicated time (monitored by TLC). Then the mixture was purified by silica gel column chromatography (petroleum ether/ethyl acetate = 8:1) to afford the desired products **3**.

## 6) Characterization data for the products

### *Benzyl 1-benzoyl-5-methyl-3-phenyl-4,5-dihydro-1H-pyrazole-5-carboxylate(3a)*

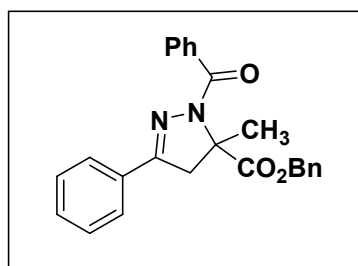

Colorless oil. Yield 98% (39.0 mg); <sup>1</sup>H NMR (400 MHz, CDCl<sub>3</sub>, ppm): δ 7.93 (d, *J* = 7.2 Hz, 2H), 7.63-7.61(m, 2H), 7.50-7.35 (m, 6H), 7.32-7.23 (m, 5H), 5.25 (d, *J* = 12.4 Hz, 1H), 5.20 (d, *J* = 12.4 Hz, 1H), 3.54 (d, *J* = 17.2 Hz, 1H), 3.18 (d, *J* = 17.2 Hz, 1H), 1.88 (s, 3H). <sup>13</sup>C NMR (100 MHz, CDCl<sub>3</sub>, ppm): δδ 171.4, 166.3, 152.7, 135.5, 134.0, 131.1, 130.9, 130.5, 130.1, 128.8, 128.5, 128.3, 128.2, 127.7, 126.7, 67.5, 67.4, 45.8, 22.0. HRMS calcd for C<sub>25</sub>H<sub>22</sub>N<sub>2</sub>O<sub>3</sub> [M+H]<sup>+</sup> 399.1682, found: 399.1678.

### *Benzyl 1-benzoyl-3-(2-bromophenyl)-5-methyl-4,5-dihydro-1H-pyrazole-5-carboxylate (3b)*

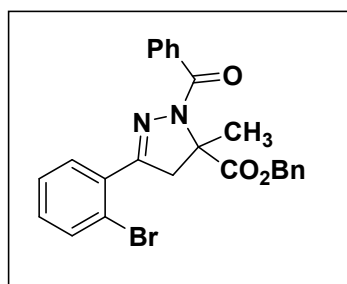

Colorless oil. Yield 82% (39.1 mg); <sup>1</sup>H NMR (400 MHz, CDCl<sub>3</sub>, ppm): δ 7.94 (d, *J* = 7.9 Hz, 2H), 7.62-7.60 (m, 2H), 7.49-7.33 (m, 6H), 7.31-7.21 (m, 4H), 5.24 (d, *J* = 12.4 Hz, 1H), 5.20 (d, *J* = 12.4 Hz, 1H), 3.54 (d, *J* = 17.2 Hz, 1H), 3.16 (d, *J* = 17.2 Hz, 1H), 1.88 (s, 3H). <sup>13</sup>C NMR (100 MHz, CDCl<sub>3</sub>, ppm): δ 171.4, 166.3, 152.7, 135.6, 134.1, 131.1, 130.9, 130.5, 130.1, 128.8, 128.6, 128.3, 128.2, 127.7, 126.7, 67.5, 67.4, 45.8, 22.1. HRMS calcd for C<sub>25</sub>H<sub>21</sub>BrN<sub>2</sub>O<sub>3</sub> [M+Na]<sup>+</sup> 500.2915, found: 500.2919.

### *Benzyl 1-benzoyl-3-(2-fluorophenyl)-5-methyl-4,5-dihydro-1H-pyrazole-5-carboxylate(3c)*

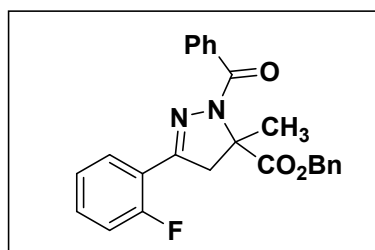

Colorless oil. Yield 78% (32.4 mg); <sup>1</sup>H NMR (400

MHz, CDCl<sub>3</sub>, ppm):  $\delta$  7.95 (d,  $J$  = 7.9 Hz, 2H), 7.86-7.81 (m, 1H), 7.52-7.28 (m, 9H), 7.17-7.07 (m, 2H), 5.29 (d,  $J$  = 12.4 Hz, 1H), 5.23 (d,  $J$  = 12.4 Hz, 1H), 3.70 (d,  $J$  = 17.2 Hz, 1H), 3.68 (d,  $J$  = 17.2 Hz, 1H), 1.91 (s, 3H).

<sup>13</sup>C NMR (100 MHz, CDCl<sub>3</sub>, ppm):  $\delta$  171.4, 166.5, 161.2 ( $J$ =252.8 Hz), 149.4 ( $J$ =2.5 Hz), 135.5, 134.0, 132.2, 132.1, 131.1, 130.0, 129.0, 128.5, 128.3, 127.7, 124.5, 119.0, 118.9, 116.6, 116.4, 67.5, 67.4, 48.2, 48.1, 22.0. HRMS calcd for C<sub>25</sub>H<sub>21</sub>FN<sub>2</sub>O<sub>3</sub> [2M+Na]<sup>+</sup> 855.2948, found: 855.2944.

***Benzyl 1-benzoyl-5-methyl-3-(*o*-tolyl)-4,5-dihydro-1H-pyrazole-5-carboxylate(3d)***

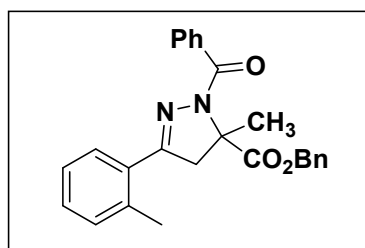

Colorless oil. Yield 95% (39.1 mg); <sup>1</sup>H NMR (400 MHz, CDCl<sub>3</sub>, ppm):  $\delta$  7.89-7.87 (m, 2H), 7.46-7.19 (m, 12H), 5.26 (d,  $J$  = 12.4 Hz, 1H), 5.20 (d,  $J$  = 12.4 Hz, 1H), 3.60 (d,  $J$  = 17.2 Hz, 1H), 3.22 (d,  $J$  = 17.2 Hz, 1H), 2.46 (s, 3H), 1.89 (s, 3H). <sup>13</sup>C NMR (100 MHz, CDCl<sub>3</sub>, ppm):  $\delta$  171.5, 166.7, 153.4, 138.2, 135.6, 134.2, 132.0, 131.0, 129.8, 129.6, 128.9, 128.6, 128.3, 128.2, 127.5, 126.0, 67.5, 66.3, 48.1, 23.4, 21.9. HRMS calcd for C<sub>26</sub>H<sub>24</sub>N<sub>2</sub>O<sub>3</sub> [M+H]<sup>+</sup> 413.1667, found: 413.1669.

***Benzyl 1-benzoyl-3-(3-chlorophenyl)-5-methyl-4,5-dihydro-1H-pyrazole-5-carboxylate(3e)***

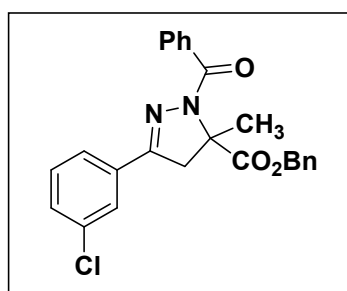

Colorless oil. Yield 93% (40.3 mg); <sup>1</sup>H NMR (400 MHz, CDCl<sub>3</sub>, ppm):  $\delta$  7.91-7.89 (m, 2H), 7.58 (s, 1H), 7.51-7.41 (m, 4H), 7.36-7.23 (m, 7H), 5.26 (d,  $J$  = 12.4 Hz, 1H), 5.19 (d,  $J$  = 12.4 Hz, 1H), 3.51 (d,  $J$  = 17.2 Hz, 1H), 3.14 (d,  $J$  = 17.2 Hz, 1H), 1.88 (s, 3H). <sup>13</sup>C NMR (100 MHz, CDCl<sub>3</sub>, ppm):  $\delta$  171.2, 166.4, 151.4, 136.5, 135.5, 134.0, 131.1, 130.0, 129.5, 129.0, 128.5, 128.3, 128.2, 127.9, 127.7, 67.6, 67.6, 45.7, 22.0. HRMS calcd for C<sub>25</sub>H<sub>21</sub>ClN<sub>2</sub>O<sub>3</sub> [M+Na]<sup>+</sup> 455.1132, found: 455.1136.

***Benzyl 1-benzoyl-3-(3-methoxyphenyl)-5-methyl-4,5-dihydro-1H-pyrazole-5-carboxylate(3f)***

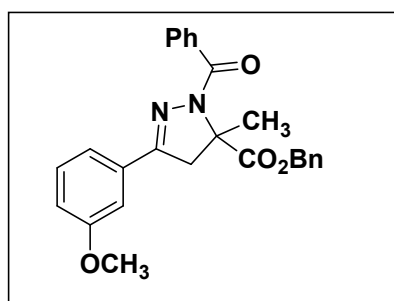

Colorless oil. Yield 92% (39.4 mg); <sup>1</sup>H NMR (400 MHz, CDCl<sub>3</sub>, ppm):  $\delta$  7.94-7.92 (m, 2H), 7.49-7.39

(m, 3H), 7.30-7.23 (m, 6H), 7.18-7.16 (m, 2H), 6.95-6.92 (m, 1H), 5.24 (d,  $J = 12.4$  Hz, 1H), 5.19 (d,  $J = 12.4$  Hz, 1H), 3.77 (s, 3H), 3.53 (d,  $J = 17.2$  Hz, 1H), 3.15 (d,  $J = 17.2$  Hz, 1H), 1.88 (s, 3H).  $^{13}\text{C}$  NMR (100 MHz,  $\text{CDCl}_3$ , ppm): 171.4, 166.3, 159.8, 152.6, 135.5, 134.1, 132.3, 131.1, 130.1, 129.9, 128.5, 128.3, 128.2, 127.6, 119.3, 116.1, 112.0, 67.5, 55.3, 45.9, 22.0. HRMS calcd for  $\text{C}_{26}\text{H}_{24}\text{N}_2\text{O}_4$   $[\text{2M}+\text{Na}]^+$  879.3649, found: 879.3644.

***Benzyl 1-benzoyl-5-methyl-3-(*m*-tolyl)-4,5-dihydro-1H-pyrazole-5-carboxylate(3g)***

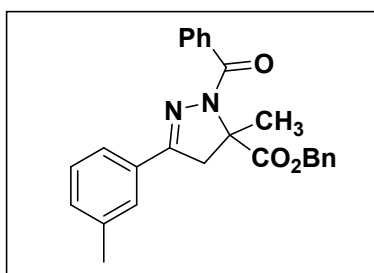

Colorless oil. Yield 89% (36.7 mg);  $^1\text{H}$  NMR (400 MHz,  $\text{CDCl}_3$ , ppm):  $\delta$  7.95-7.93 (m, 2H), 7.48-7.38 (m, 5H), 7.31-7.22 (m, 6H), 7.19-7.17 (m, 1H), 5.24 (d,  $J = 12.4$  Hz, 1H), 5.18 (d,  $J = 12.4$  Hz, 1H), 3.53 (d,  $J = 17.2$  Hz, 1H), 3.14 (d,  $J = 17.2$  Hz, 1H), 2.32 (s, 3H), 1.87 (s, 3H).  $^{13}\text{C}$  NMR (100 MHz,  $\text{CDCl}_3$ , ppm):  $\delta$  171.4, 166.3, 153.0, 138.5, 135.6, 134.2, 131.4, 131.1, 131.0, 130.1, 128.7, 128.6, 128.3, 128.3, 127.7, 127.3, 124.0, 67.5, 67.4, 45.9, 22.1, 21.5. HRMS calcd for  $\text{C}_{26}\text{H}_{24}\text{N}_2\text{O}_3$   $[\text{M}+\text{Na}]^+$  4435.1647, found: 435.1669.

***Benzyl 1-benzoyl-3-(4-chlorophenyl)-5-methyl-4,5-dihydro-1H-pyrazole-5-carboxylate(3h)***

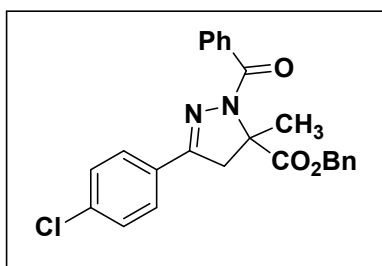

White solid. Yield 98% (42.4 mg);  $^1\text{H}$  NMR (400 MHz,  $\text{CDCl}_3$ , ppm):  $\delta$  7.91-7.89(m, 2H), 7.55-7.41 (m, 5H), 7.35-7.24 (m, 7H), 5.25 (d,  $J = 12.4$  Hz, 1H), 5.19 (d,  $J = 12.4$  Hz, 1H), 3.51 (d,  $J = 17.2$  Hz, 1H), 3.14 (d,  $J = 17.2$  Hz, 1H), 1.88 (s, 3H).  $^{13}\text{C}$  NMR (100 MHz,  $\text{CDCl}_3$ , ppm): 171.2, 166.4, 151.4, 136.5, 135.5, 134.0, 131.1, 130.0, 129.5, 129.0, 128.5, 128.3, 128.2, 127.9, 127.6, 67.6, 67.5, 45.7, 22.7. HRMS calcd for  $\text{C}_{25}\text{H}_{21}\text{ClN}_2\text{O}_3$   $[\text{2M}+\text{Na}]^+$  887.2269, found: 887.2272.

***Benzyl 1-benzoyl-3-(4-fluorophenyl)-5-methyl-4,5-dihydro-1H-pyrazole-5-carboxylate(3i)***

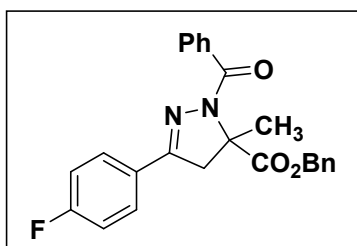

Colorless oil. Yield 94% (39.1 mg);  $^1\text{H}$  NMR (400 MHz,  $\text{CDCl}_3$ , ppm):  $\delta$  7.83-7.81 (m, 2H), 7.54-7.50 (m, 2H), 7.42-7.32 (m, 3H), 7.27-7.16 (m, 5H), 6.70-6.96

(m, 2H), 5.17 (d,  $J = 12.4$  Hz, 1H), 5.11 (d,  $J = 12.4$  Hz, 1H), 3.44 (d,  $J = 17.4$  Hz, 1H), 3.06 (d,  $J = 17.4$  Hz, 1H), 1.80 (s, 3H).  $^{13}\text{C}$  NMR (100 MHz,  $\text{CDCl}_3$ , ppm):  $\delta$  171.3, 166.3, 165.3, 151.6, 135.5, 134.0, 131.1, 130.0, 128.7, 128.6, 128.3, 128.2, 127.7, 127.2, 116.0, 115.8, 67.5, 45.8, 22.0. HRMS calcd for  $\text{C}_{25}\text{H}_{21}\text{FN}_2\text{O}_3$  [ $2\text{M}+\text{Na}$ ] $^+$  855.2947, found: 855.2944.

***Benzyl 1-benzoyl-3-(4-methoxyphenyl)-5-methyl-4,5-dihydro-1H-pyrazole-5-carboxylate(3j)***

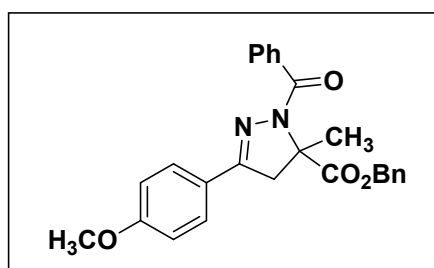

Colorless oil. Yield 96% (41.1 mg);  $^1\text{H}$  NMR (400 MHz,  $\text{CDCl}_3$ , ppm):  $\delta$  7.95-7.93 (m, 2H), 7.57-7.55 (m, 2H), 7.49-7.40 (m, 3H), 7.33-7.27 (m, 4H), 7.24 (s, 1H), 6.90-6.88 (m, 2H), 5.25 (d,  $J = 12.4$  Hz, 1H), 5.20 (d,  $J = 12.4$  Hz, 1H), 3.81 (s, 3H), 3.52 (d,  $J = 17.2$  Hz, 1H), 3.14 (d,  $J = 17.2$  Hz, 1H), 1.87 (s, 3H).  $^{13}\text{C}$  NMR (100 MHz,  $\text{CDCl}_3$ , ppm):  $\delta$  171.5, 166.0, 161.5, 152.4, 135.6, 134.2, 131.0, 130.0, 128.5, 128.3, 128.2, 128.2, 127.6, 123.5, 114.2, 67.5, 67.3, 55.4, 45.9, 22.0. HRMS calcd for  $\text{C}_{26}\text{H}_{24}\text{N}_2\text{O}_4$  [ $\text{M}+\text{Na}$ ] $^+$  429.1816, found: 429.1822.

***Benzyl 1-benzoyl-5-methyl-3-(4-nitrophenyl)-4,5-dihydro-1H-pyrazole-5-carboxylate(3k)***

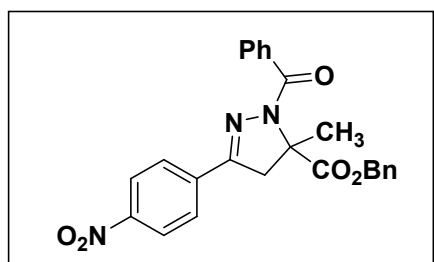

White solid. Yield 90% (39.9 mg);  $^1\text{H}$  NMR (400 MHz,  $\text{CDCl}_3$ , ppm):  $\delta$  8.22-8.20 (m, 2H), 7.90-7.88 (m, 2H), 7.76-7.74 (m, 2H), 7.54-7.50 (m, 1H), 7.46-7.43 (m, 2H), 7.32-7.25 (m, 5H), 5.26 (d,  $J = 12.4$  Hz, 1H), 5.20 (d,  $J = 12.4$  Hz, 1H), 3.62 (d,  $J = 17.2$  Hz, 1H), 3.22 (d,  $J = 17.2$  Hz, 1H), 1.92 (s, 3H).  $^{13}\text{C}$  NMR (100 MHz,  $\text{CDCl}_3$ , ppm):  $\delta$  170.1, 166.7, 150.3, 148.5, 137.0, 135.3, 133.7, 131.4, 129.9, 128.6, 128.4, 128.3, 127.8, 127.4, 124.0, 68.1, 67.7, 45.5, 22.1. HRMS calcd for  $\text{C}_{25}\text{H}_{21}\text{N}_3\text{O}_5$  [ $\text{M}+\text{Na}$ ] $^+$  466.1387, found: 466.1382.

***Benzyl 1-benzoyl-5-methyl-3-(p-tolyl)-4,5-dihydro-1H-pyrazole-5-carboxylate(3l)***

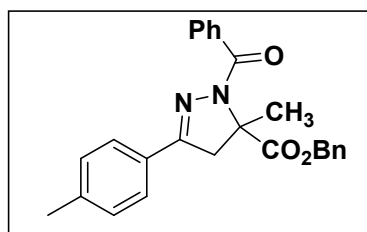

Colorless oil. Yield 98% (40.4 mg);  $^1\text{H}$  NMR (400 MHz,  $\text{CDCl}_3$ , ppm):  $\delta$  7.95-7.93 (m, 2H), 7.52-7.40 (m,



5H), 7.35-7.24 (m, 5H), 7.19-7.17 (m, 2H), 5.25 (d,  $J = 12.4$  Hz, 1H), 5.20 (d,  $J = 12.4$  Hz, 1H), 3.53 (d,  $J = 17.2$  Hz, 1H), 3.16 (d,  $J = 17.2$  Hz, 1H), 2.36 (s, 3H), 1.87 (s, 3H).  $^{13}\text{C}$  NMR (100 MHz,  $\text{CDCl}_3$ , ppm):  $\delta$  171.5, 166.2, 152.7, 140.9, 135.6, 134.1, 131.0, 130.1, 129.5, 128.5, 128.2, 128.2, 128.2, 127.6, 126.7, 67.5, 67.3, 22.0, 21.6. HRMS calcd for  $\text{C}_{26}\text{H}_{24}\text{N}_2\text{O}_3$   $[2\text{M}+\text{Na}]^+$  847.3336, found: 847.3338.

***Ethyl 1-benzoyl-5-methyl-3-phenyl-4,5-dihydro-1H-pyrazole-5-carboxylate(3p)***

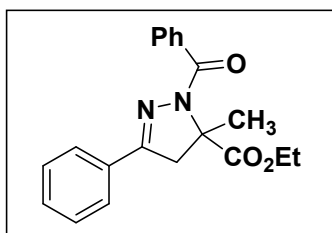

Colorless oil. Yield 98% (32.9 mg);  $^1\text{H}$  NMR (400 MHz,  $\text{CDCl}_3$ , ppm):  $\delta$  7.98-7.96 (m, 2H), 7.67-7.65 (m, 2H), 7.51-7.37 (m, 6H), 4.36-4.17 (m, 2H), 3.63 (d,  $J = 17.2$  Hz, 1H), 3.20 (d,  $J = 17.2$  Hz, 1H), 1.86 (s, 3H), 1.26 (t,  $J = 7.1$  Hz, 3H).  $^{13}\text{C}$  NMR (100 MHz,  $\text{CDCl}_3$ , ppm):  $\delta$  171.5, 166.2, 152.6, 134.2, 131.0, 130.5, 130.0, 128.8, 127.7, 67.3, 61.9, 45.9, 22.0, 14.2. HRMS calcd for  $\text{C}_{20}\text{H}_{20}\text{N}_2\text{O}_3$   $[2\text{M}+\text{Na}]^+$  695.2807, found: 695.2801.

***Ethyl 1-benzoyl-5-ethyl-3-phenyl-4,5-dihydro-1H-pyrazole-5-carboxylate(3q)***

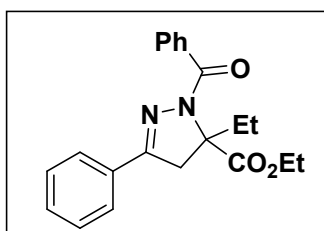

Colorless oil. Yield 92% (36.3 mg);  $^1\text{H}$  NMR (400 MHz,  $\text{CDCl}_3$ , ppm):  $\delta$  7.97-7.95 (m, 2H), 7.68-7.65 (m, 2H), 7.51-7.37 (m, 6H), 4.35-4.16 (m, 2H), 3.52 (d,  $J = 17.2$  Hz, 1H), 3.30 (d,  $J = 17.2$  Hz, 1H), 2.77-2.68 (m, 1H), 2.12-2.02 (m, 1H), 1.25 (t,  $J = 7.4$  Hz, 3H), 0.92 (t,  $J = 7.4$  Hz, 3H).  $^{13}\text{C}$  NMR (100 MHz,  $\text{CDCl}_3$ , ppm): 171.7, 166.5, 152.7, 134.3, 131.0, 130.9, 130.5, 130.0, 128.8, 127.7, 126.7, 70.7, 61.7, 42.7, 26.4, 14.2, 7.3. HRMS calcd for  $\text{C}_{21}\text{H}_{22}\text{N}_2\text{O}_3$   $[\text{M}+\text{H}]^+$  351.1691, found: 351.1696.

***N'-(2-chloro-1-(2-fluorophenyl)ethylidene)benzohydrazide (1c)***

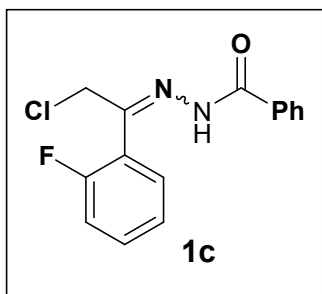

White solid.  $^1\text{H}$  NMR (400 MHz,  $\text{CDCl}_3$ , ppm):  $\delta$  10.83 (s, 1H), 7.66-7.64 (m, 2H), 7.60-7.53 (m, 3H), 7.47-7.43 (m, 2H), 7.40-7.35 (m, 2H), 4.70 (s, 2H).  $^{13}\text{C}$  NMR (100 MHz,  $\text{CDCl}_3$ , ppm): 160.8, 158.3, 134.0, 132.8, 132.1, 130.6, 128.7, 128.4, 125.5, 119.7, 116.7, 48.6. HRMS calcd for  $\text{C}_{15}\text{H}_{12}\text{ClFN}_2\text{O}$   $[\text{M}+\text{H}]^+$  291.0691, found: 291.0687.

***N'-(2-chloro-1-(3-methoxyphenyl)ethylidene)benzohydrazide(1f)***

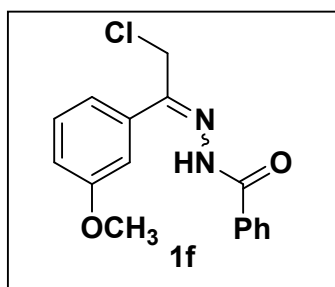

White solid.  $^1\text{H}$  NMR (400 MHz,  $\text{CDCl}_3$ , ppm):  $\delta$  9.18 (s, 1H), 7.92-7.90 (m, 1H), 7.42-7.34 (m, 5H), 7.10-7.07 (m, 2H), 6.94-6.92 (m, 3H), 4.55 (s, 2H), 3.88 (s, 3H),  $^{13}\text{C}$  NMR (100 MHz,  $\text{CDCl}_3$ , ppm): 160.7, 159.9, 136.7, 133.0, 132.6, 131.6, 131.2, 129.7, 119.3, 116.2, 116.0, 113.0, 55.5, 47.3. HRMS calcd for  $\text{C}_{16}\text{H}_{15}\text{ClN}_2\text{O}_2$

$[\text{M}+\text{H}]^+$  303.0878, found: 303.0872.

### 7) X-ray crystallographic data of **3h**

The structure of **3h** were determined by the X-ray diffraction analysis. CCDC 1840892 contain the structure and supplementary crystallographic data. These data can be obtained free of charge on application to the Director, CCDC 12 Union Road, Cambridge CB2 1EZ, UK (fax (+44) 1223-336033; or e-mail [deposit@ccdc.cam.ac.uk](mailto:deposit@ccdc.cam.ac.uk)) or via [www.ccdc.cam.ac.uk/data\\_request/cif](http://www.ccdc.cam.ac.uk/data_request/cif).

Table 1 Crystal data and structure refinement for Compounds **3h**.

|                             |                                                    |
|-----------------------------|----------------------------------------------------|
| Identification code         | <b>3h</b>                                          |
| CCDC Deposit number         | 1840892                                            |
| Empirical formula           | $\text{C}_{25}\text{H}_{21}\text{ClN}_2\text{O}_3$ |
| Formula weight              | 432.89                                             |
| Temperature (K)             | 293.15                                             |
| Wavelength ( $\text{\AA}$ ) | 1.54178                                            |
| Crystal system              | triclinic                                          |
| space group                 | P -1                                               |
| Unit cell dimensions        | a=6.3041(16)                                       |
| ( $\text{\AA}$ )            | b=12.0699(17)                                      |
|                             | c=14.252(3)                                        |
| ( $^\circ$ )                | $\alpha$ =88.684(12)                               |
|                             | $\beta$ =79.885(12)                                |
|                             | $\gamma$ =89.121(14)                               |
| Volume                      | 1067.2(4)                                          |
| Z                           | 2                                                  |

|                                     |                     |
|-------------------------------------|---------------------|
| Calcd. density (Mg/m <sup>3</sup> ) | 1.347               |
| <i>F</i> (000)                      | 452                 |
| Limiting indices                    | -7 ≤ <i>h</i> ≤ 7   |
|                                     | -14 ≤ <i>k</i> ≤ 14 |
|                                     | -17 ≤ <i>l</i> ≤ 17 |

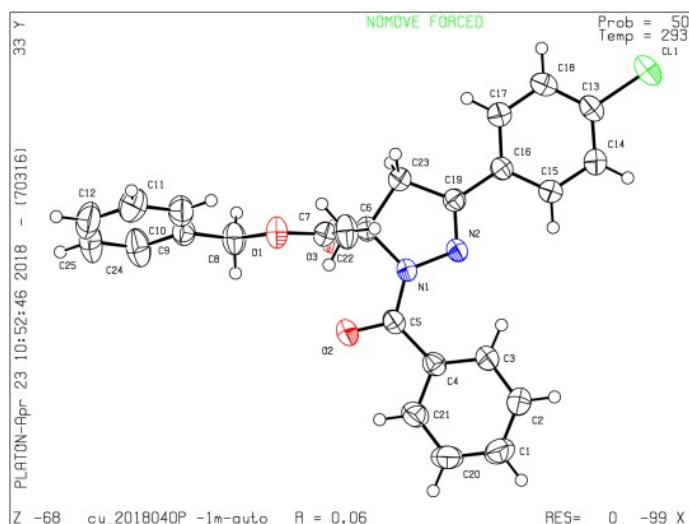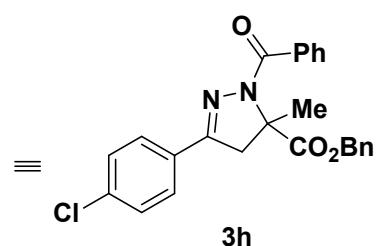

## 8) References

- 1) (a) Chen, J.-R.; Dong, W.-R.; Candy, M.; Pan, F.-F.; Jörres, M.; Bolm, C. *J. Am. Chem. Soc.* **2012**, 134, 6924; (b) Swamy, P.; Kumar, M. A.; Reddy, M. M.; Narender, N. *Chem. Lett.* **2012**, 41, 432; (c) Lee, J. C.; Bae, Y. H.; Chang, S. K. *Bull. Korean Chem. Soc.* **2003**, 34, 407; (d) Zhang, X.-X.; Liu, L.; Li, C.-B. *RSC Adv.* **2016**, 6, 25339; (e) Chen, C.; Zhu, M.-H.; Jiang, L.-H.; Zeng, Z.-B.; Yi, N.-N.; Xiang, J. N. *Org. Biomol. Chem.* **2017**, 15, 8134.
- 2) (a) Nakagawa, Y. K.; Chanthamath, S.D.; Fujisawa, I.; Shibatomi K.; Iwasa S. *J. Chem. Commun.* **2013**, 53, 3753; (b) Li, H.; Wulff, W. D. *J. Am. Chem. Soc.* **2011**, 133, 8892.
- 3) (a) Gieshoff, T.; Schollmeyer, D.; Waldvogel, S. R. *Angew. Chem. Int. Ed.* **2016**, 55, 9437; (b) Verma, K.; Banerjee, P. *Adv. Synth. Catal.* **2016**, 358, 2053.

## 9) Copies of NMR spectra data

### *Benzyl 1-benzoyl-5-methyl-3-phenyl-4,5-dihydro-1H-pyrazole-5-carboxylate(3a)*

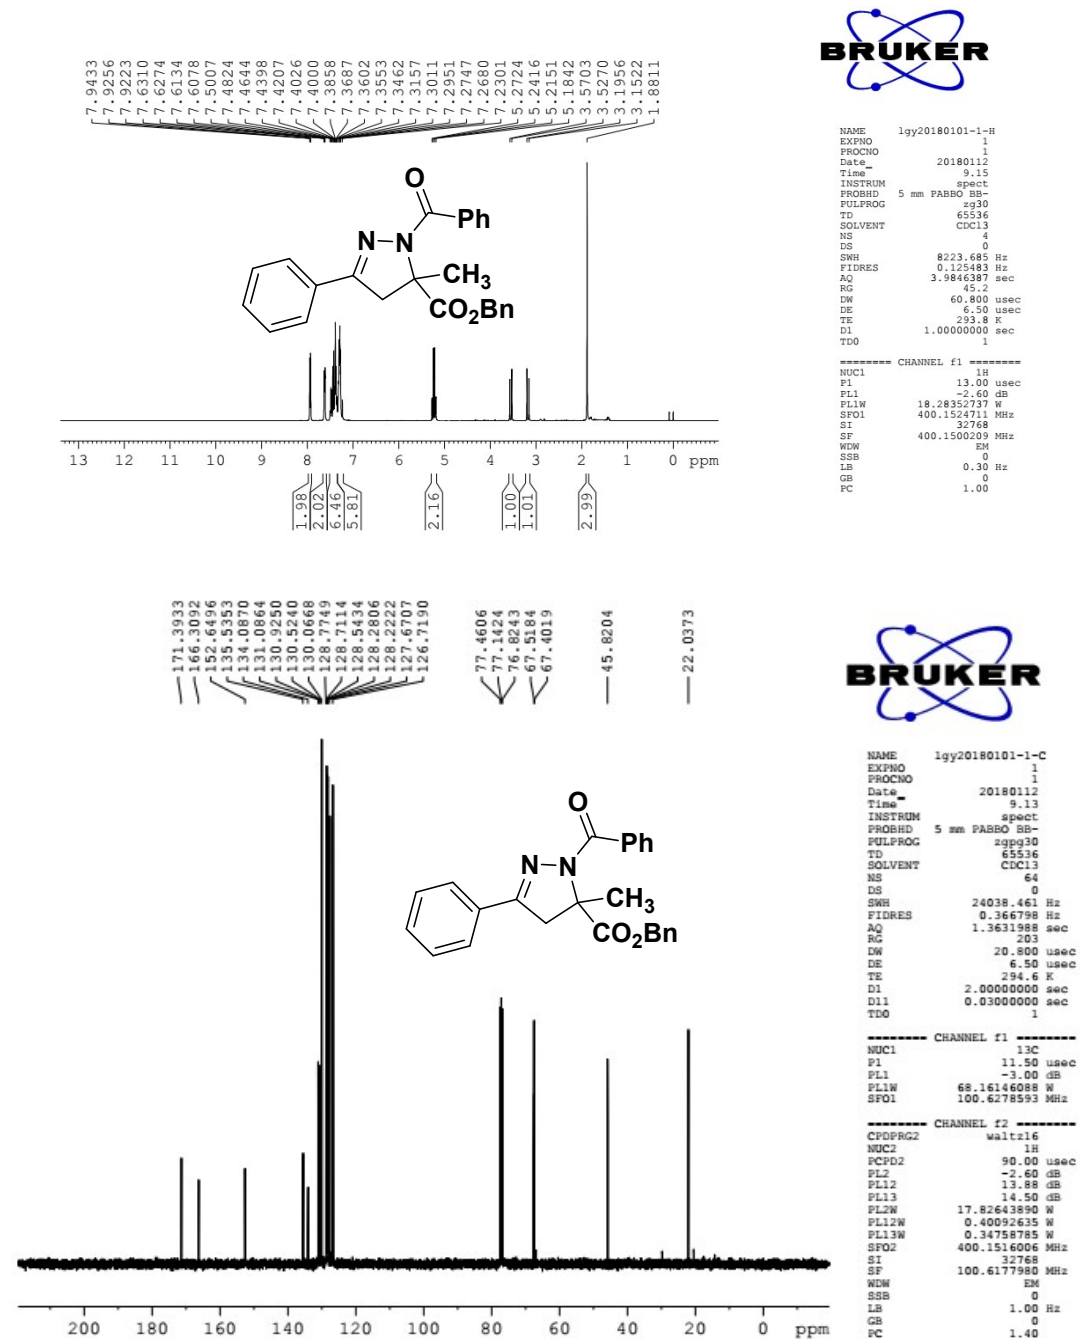

**Benzyl 1-benzoyl-3-(2-bromophenyl)-5-methyl-4,5-dihydro-1H-pyrazole-5-carboxylate (3b)**

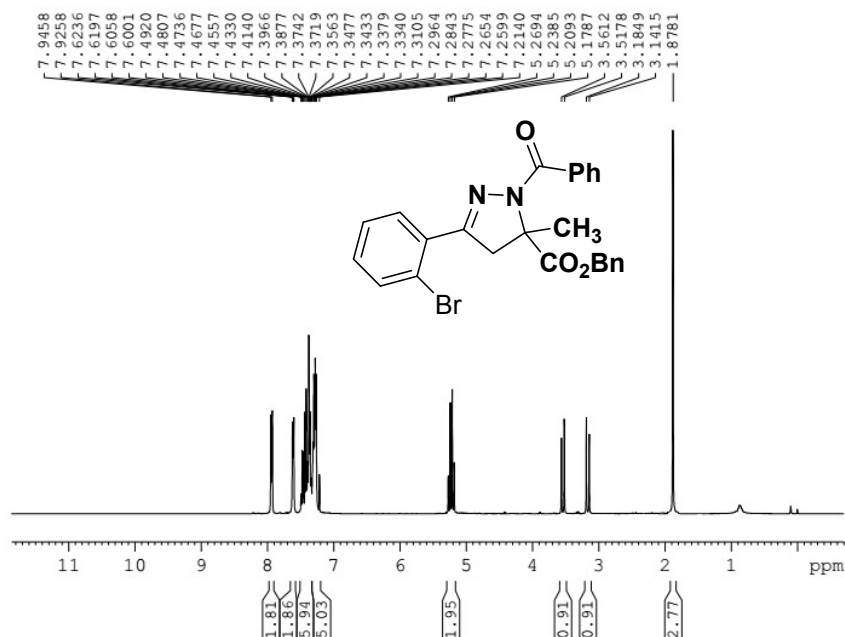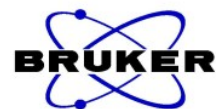

```

NAME      lgy20180109-3-H
EXPNO     1
PROCNO    1
Date_     20180112
Time      8.47
INSTRUM   spect
PROBHD    5 mm PABBO BB-
PULPROG   zg30
TD        65536
SOLVENT   CDCl3
NS        4
DS        0
SWH       8223.685 Hz
FIDRES    0.125483 Hz
AQ        3.9846387 sec
RG        32
DW        60.800 usec
DE        6.50 usec
TE        293.4 K
D1        1.0000000 sec
TD0       1

----- CHANNEL f1 -----
NUC1      1H
P1        13.00 usec
PL1       -2.60 dB
PL1W      18.28352737 W
SFO1      400.1524711 MHz
SI        32768
SF        400.1500269 MHz
WDW       EM
SSB       0
LB        0.30 Hz
GB        0
PC        1.00
    
```

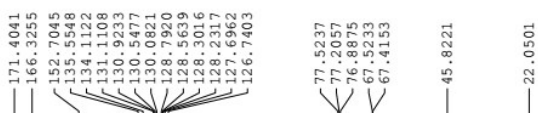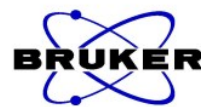

```

NAME      lgy20180109-3-c
EXPNO     1
PROCNO    1
Date_     20180112
Time      8.45
INSTRUM   spect
PROBHD    5 mm PABBO BB-
PULPROG   zgpg30
TD        65536
SOLVENT   CDCl3
NS        32
DS        0
SWH       24038.461 Hz
FIDRES    0.366798 Hz
AQ        1.3631988 sec
RG        203
DW        20.800 usec
DE        6.50 usec
TE        294.5 K
D1        2.0000000 sec
D11       0.0300000 sec
TD0       1

----- CHANNEL f1 -----
NUC1      13C
P1        11.50 usec
PL1       -3.00 dB
PL1W      68.16146088 W
SFO1      100.6278593 MHz

----- CHANNEL f2 -----
CPDPRG2   waltz16
NUC2      1H
PCPD2     90.00 usec
PL2       -2.60 dB
PL12      13.88 dB
PL13      14.50 dB
PL2W      17.82643890 W
PL12W     0.40092635 W
PL13W     0.34758785 W
SFO2      400.1516006 MHz
SI        32768
SF        100.6177980 MHz
WDW       EM
SSB       0
LB        1.00 Hz
GB        0
PC        1.40
    
```

**Benzyl 1-benzoyl-3-(2-fluorophenyl)-5-methyl-4,5-dihydro-1H-pyrazole-5-**

carboxylate(3c)

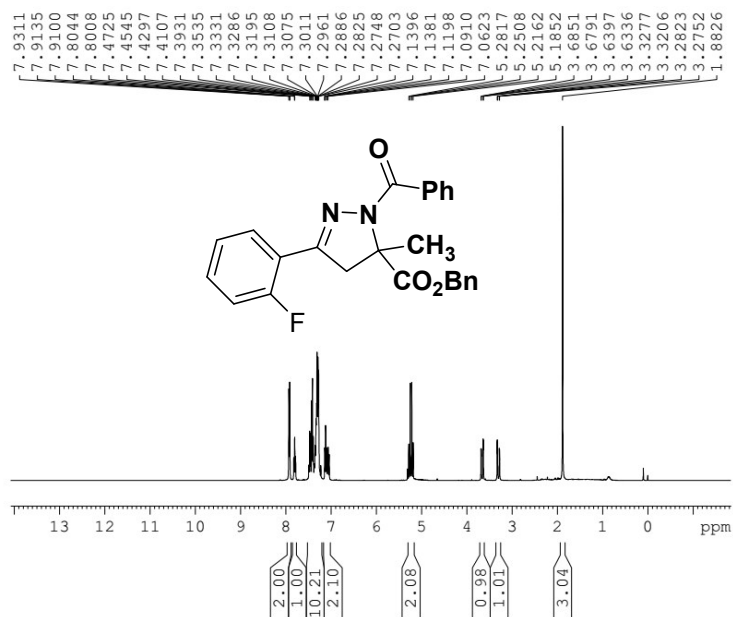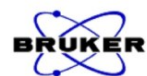

```

NAME          LGY-2F-H
EXPNO         1
PROCNO        1
Date_         20180306
Time_         15.30
INSTRUM       spect
PROBHD        5 mm PABBO BB-
PULPROG       zg30
TD             65536
SOLVENT       CDCl3
NS             16
DS             2
SWH           8223.685 Hz
FIDRES        0.125483 Hz
AQ            3.9845387 sec
RG            90.5
DW            60.800 usec
DE            6.50 usec
TE            294.8 K
D1            1.00000000 sec
TDO           1

===== CHANNEL f1 =====
NUC1          1H
P1            13.00 usec
PL1           -2.60 dB
PL1W          17.82643890 W
SFO1          400.1524711 MHz
SI            32768
SF            400.1500223 MHz
WDW           EM
SSB           0
LB            0.30 Hz
GB            0
PC            1.00
    
```

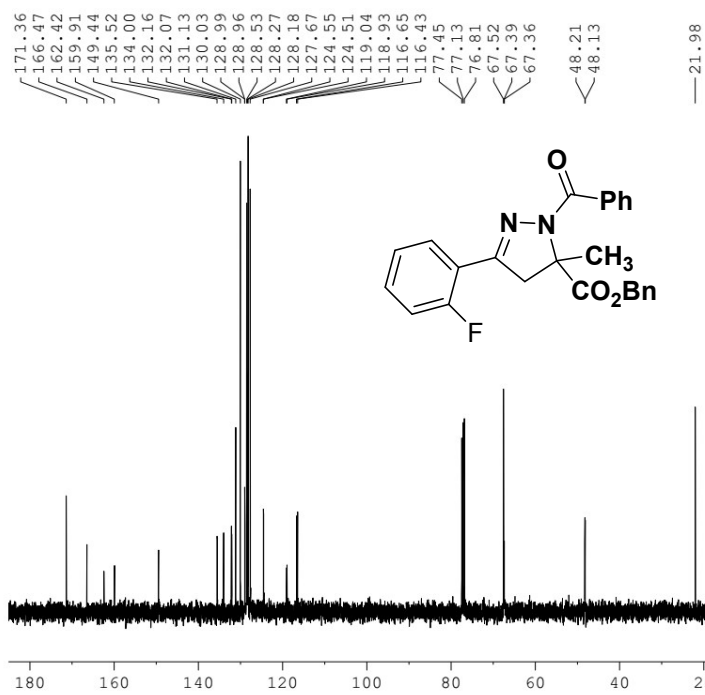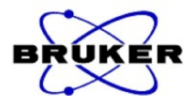

```

NAME          LGY20180109-2-2-C
EXPNO         1
PROCNO        1
Date_         20180306
Time_         16.05
INSTRUM       spect
PROBHD        5 mm PABBO BB-
PULPROG       zgpg30
TD             65536
SOLVENT       CDCl3
NS             16
DS             4
SWH           24038.461 Hz
FIDRES        0.366798 Hz
AQ            1.3631988 sec
RG            203
DW            20.800 usec
DE            6.50 usec
TE            295.2 K
D1            2.00000000 sec
D11           0.03000000 sec
TDO           1

===== CHANNEL f1 =====
NUC1          13C
P1            11.50 usec
PL1           -3.00 dB
PL1W          68.16146088 W
SFO1          100.6278593 MHz

===== CHANNEL f2 =====
CPDPRG2       waltz16
NUC2          1H
PCPD2         90.00 usec
PL2           -2.60 dB
PL12          13.88 dB
PL13          14.50 dB
PL2W          17.82643890 W
FL12W         0.40092635 W
FL13W         0.34758785 W
SFO2          400.1516006 MHz
SI            32768
SF            100.6177980 MHz
WDW           EM
SSB           0
T LB          1.00 Hz
GB            0
PC            1.40
    
```

Benzyl 1-benzoyl-5-methyl-3-(o-tolyl)-4,5-dihydro-1H-pyrazole-5- carboxylate(3d)

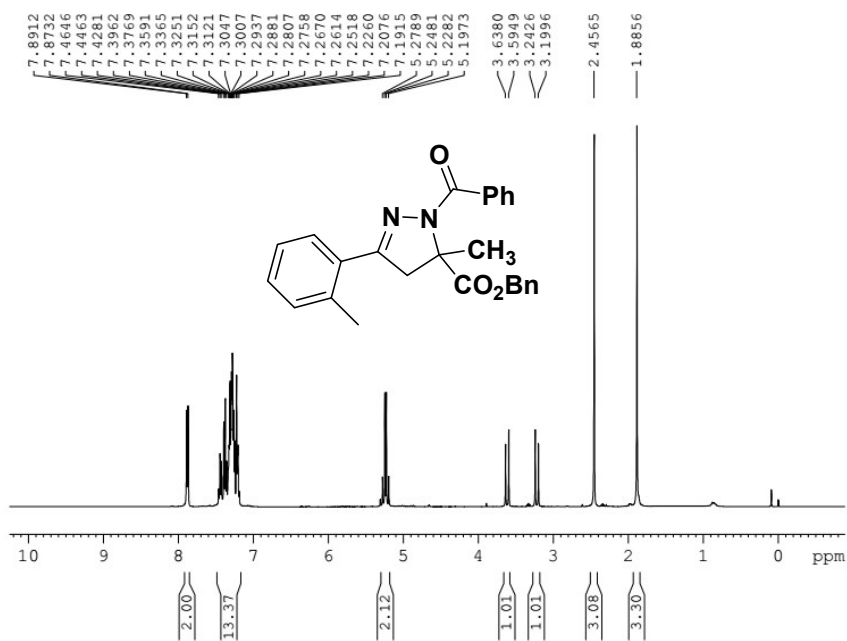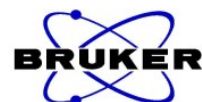

```

NAME      lgy20180115-2
EXPNO     1
PROCNO    1
Date_     20180119
Time      9.16
INSTRUM   spect
PROBHD    5 mm PABBO BB-
PULPROG   zg30
TD         65536
SOLVENT   CDCl3
NS         8
DS         2
SWH       8223.685 Hz
FIDRES    0.125483 Hz
AQ         3.9846387 sec
RG         32
DW         60.800 usec
DE         6.50 usec
TE         293.1 K
D1         1.00000000 sec
TDO        1
  
```

```

----- CHANNEL f1 -----
NUC1      1H
P1        13.00 usec
PL1       -2.60 dB
FL1W      18.28352737 W
SFO1      400.1524711 MHz
SI         32768
SF         400.1500238 MHz
WDW        EM
SSB        0
LB         0.30 Hz
GB         0
PC         1.00
  
```

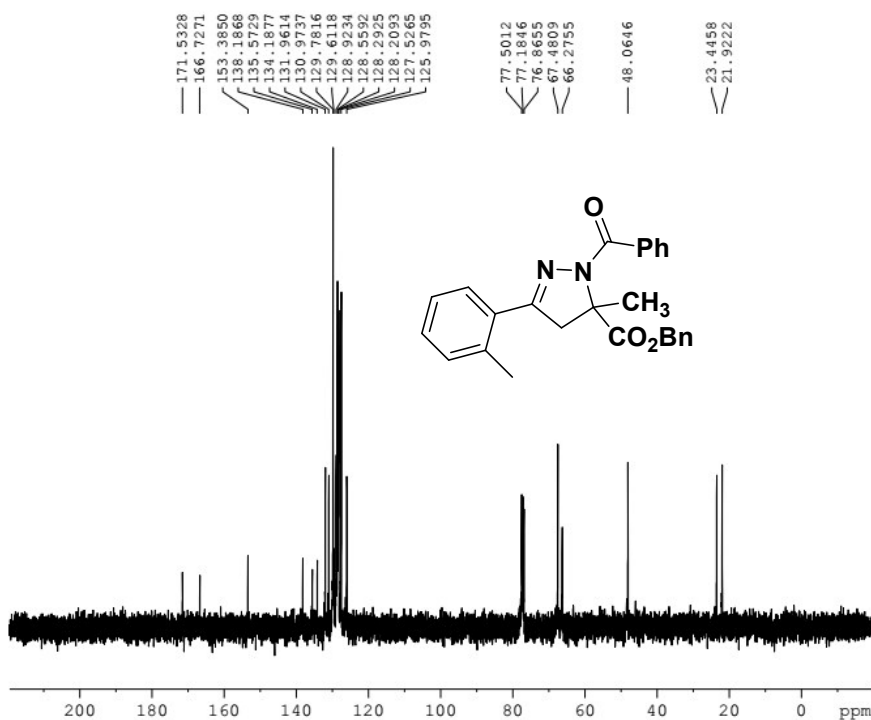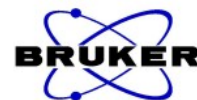

```

NAME      lgy20180115-2-c
EXPNO     1
PROCNO    1
Date_     20180123
Time      11.07
INSTRUM   spect
PROBHD    5 mm PABBO BB-
PULPROG   zgpg30
TD         65536
SOLVENT   CDCl3
NS         23
DS         4
SWH       24038.461 Hz
FIDRES    0.366798 Hz
AQ         1.3631988 sec
RG         203
DW         20.800 usec
DE         6.50 usec
TE         294.3 K
D1         2.00000000 sec
D11        0.03000000 sec
TDO        1
  
```

```

----- CHANNEL f1 -----
NUC1      13C
P1        11.50 usec
PL1       -3.00 dB
FL1W      68.16146088 W
SFO1      100.6278593 MHz
  
```

```

----- CHANNEL f2 -----
CPDPRG2   waltz16
NUC2      1H
PCPD2     90.00 usec
PL2       -2.60 dB
FL2W      13.88 dB
PL13      14.50 dB
PL2W      17.82643890 W
FL12W     0.40092635 W
FL13W     0.34758751 W
SFO2      400.1516006 MHz
SI         32768
SF         100.6177980 MHz
WDW        EM
SSB        0
LB         1.00 Hz
GB         0
PC         1.40
  
```

*Benzyl 1-benzoyl-3-(3-chlorophenyl)-5-methyl-4,5-dihydro-1H-pyrazole-5-*

**carboxylate(3e)**

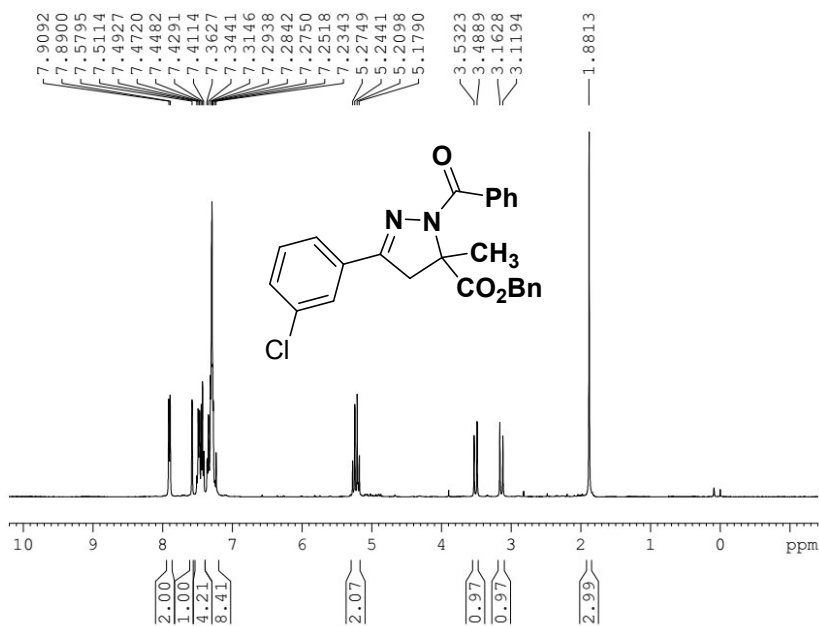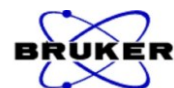

```

NAME      1gy20180105-5
EXPNO    1
PROCNO   1
Date_    20180106
Time     15.08
INSTRUM  spect
PROBHD   5 mm F4BBO BB-
PULPROG  zg30
TD        65536
SOLVENT  CDCl3
NS        8
DS        2
SWH      8223.685 Hz
FIDRES   0.125483 Hz
AQ       3.9846387 sec
RG        45.2
DW       60.800 usec
DE       6.50 usec
TE       294.4 K
D1       1.00000000 sec
TD0      1
    
```

```

===== CHANNEL f1 =====
NUC1      1H
P1        13.00 usec
PL1       -2.60 dB
PL1W     17.82643890 W
SFO1     400.1524711 MHz
SI        32768
SF       400.1500191 MHz
WDW       EM
SSB       0
LB        0.30 Hz
GB        0
FC        1.00
    
```

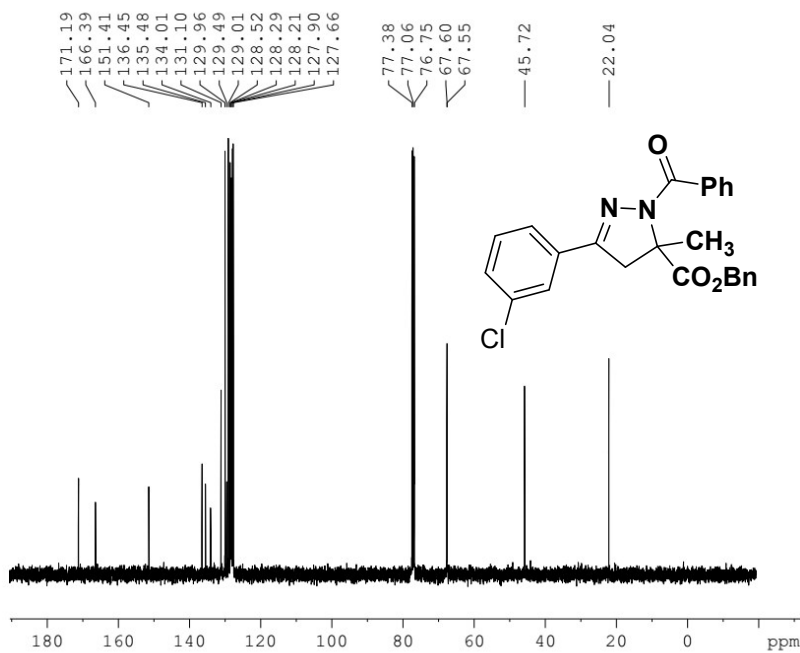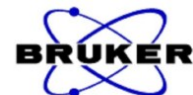

```

NAME      LGY20180403-4Cl-C
EXPNO    1
PROCNO   1
Date_    20180403
Time     15.22
INSTRUM  spect
PROBHD   5 mm F4BBO BB-
PULPROG  zgpg30
TD        65536
SOLVENT  CDCl3
NS        113
DS        4
SWH      24038.461 Hz
FIDRES   0.366798 Hz
AQ       1.3631988 sec
RG        203
DW       20.800 usec
DE       6.50 usec
TE       300.0 K
D1       2.00000000 sec
D11      0.03000000 sec
TD0      1
    
```

```

===== CHANNEL f1 =====
NUC1      13C
P1        11.50 usec
PL1       -3.00 dB
PL1W     68.16146088 W
SFO1     100.6278593 MHz

===== CHANNEL f2 =====
CPDPRG2  waltz16
NUC2      1H
PCPD2    90.00 usec
PL2       -2.60 dB
PL2W     13.88 dB
PL13     14.50 dB
PL2W     17.82643890 W
PL12W    0.40092635 W
PL13W    0.34758785 W
SFO2     400.1516006 MHz
SI        32768
SF       100.6177980 MHz
WDW       EM
SSB       0
LB        1.00 Hz
GB        0
FC        1.40
    
```

**Benzyl 1-benzoyl-3-(3-methoxyphenyl)-5-methyl-4,5-dihydro-1H-pyrazole-5-**



carboxylate(3f)

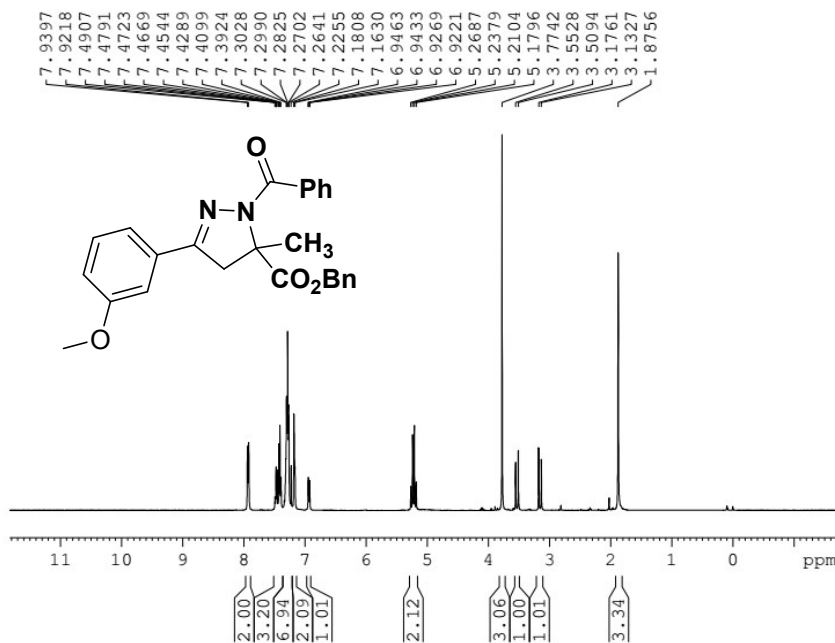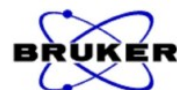

```

NAME      lgy20180105-6
EXPNO     1
PROCNO    1
Date_     20180106
Time      14.36
INSTRUM   spect
PROBHD    5 mm PABBO BB-
PULPROG   zg30
TD         65536
SOLVENT   CDCl3
NS         8
DS         2
SWH       8223.685 Hz
FIDRES    0.125483 Hz
AQ        3.9846387 sec
RG         40.3
DW        60.800 usec
DE        6.50 usec
TE        294.2 K
D1        1.00000000 sec
TDO       1
  
```

```

----- CHANNEL f1 -----
NUC1      1H
P1        13.00 usec
PL1       -2.60 dB
PL1W      17.82643890 W
SFO1      400.1524711 MHz
SI        32768
SF        400.1500225 MHz
WDW       EM
SSB       0
LB        0.30 Hz
GB        0
PC        1.00
  
```

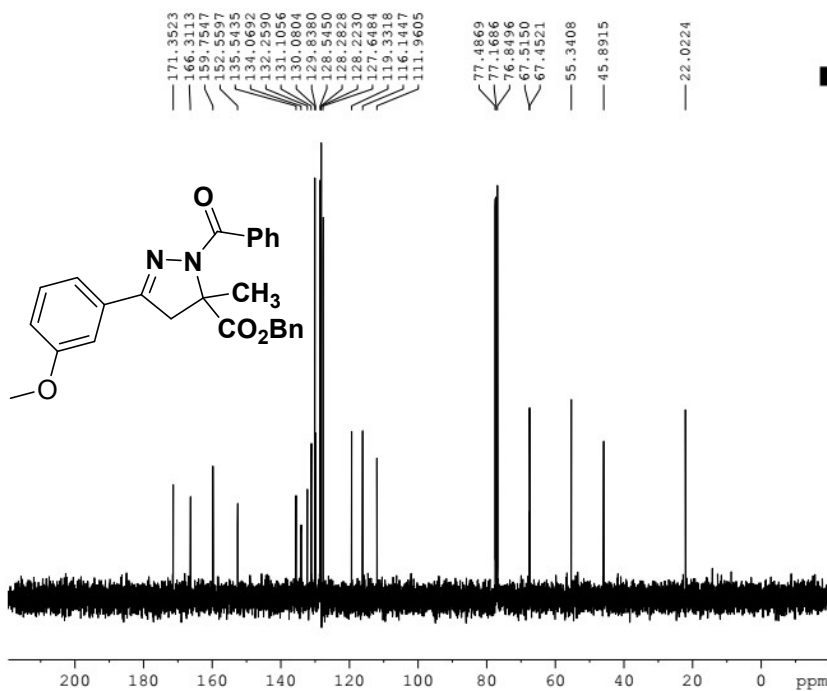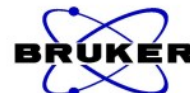

```

NAME      lgy20180105-6-c
EXPNO     1
PROCNO    1
Date_     20180106
Time      14.45
INSTRUM   spect
PROBHD    5 mm PABBO BB-
PULPROG   zgpg30
TD         65536
SOLVENT   CDCl3
NS         127
DS         4
SWH       24038.461 Hz
FIDRES    0.366798 Hz
AQ        1.3631988 sec
RG         203
DW        20.800 usec
DE        6.50 usec
TE        295.4 K
D1        2.00000000 sec
D11       0.03000000 sec
TDO       1
  
```

```

===== CHANNEL f1 =====
NUC1      13C
P1        11.50 usec
PL1       -3.00 dB
PL1W      68.16146088 W
SFO1      100.6278593 MHz
  
```

```

===== CHANNEL f2 =====
CPDPRG2   waltz16
NUC2      1H
PCPD2     90.00 usec
PL2       -2.60 dB
PL12      13.88 dB
PL13      14.50 dB
PL1W      17.82643890 W
PL12W     0.40092635 W
PL13W     0.34758785 W
SFO2      400.1516006 MHz
SI        32768
SF        100.6177980 MHz
WDW       EM
SSB       0
LB        1.00 Hz
GB        0
PC        1.40
  
```

Benzyl 1-benzoyl-5-methyl-3-(m-tolyl)-4,5-dihydro-1H-pyrazole-5-carboxylate(3g)

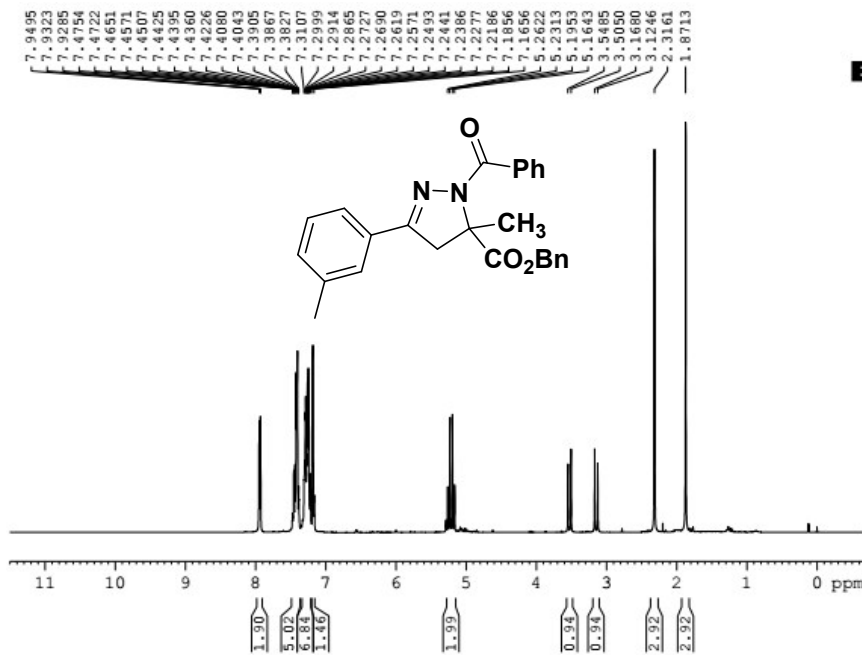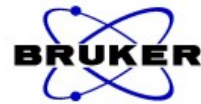

```

NAME lgy20171225-2
EXPNO 1
PROCNO 1
Date_ 20171229
Time 8.28
INSTRUM spect
PROBHD 5 mm PABBO BB-
FULPROG zg30
TD 65536
SOLVENT CDCl3
NS 8
DS 2
SWH 8223.685 Hz
FIDRES 0.125483 Hz
AQ 3.9846387 sec
RG 25.4
DE 60.800 usec
TE 292.9 K
D1 1.0000000 sec
TDO 1
  
```

```

----- CHANNEL f1 -----
NUC1 1H
P1 13.00 usec
PL1 -2.60 dB
PL1W 17.82643890 W
SF01 400.1524711 MHz
SI 32768
SF 400.1500376 MHz
WDW EM
SSB 0
LB 0.30 Hz
GB 0
PC 1.00
  
```

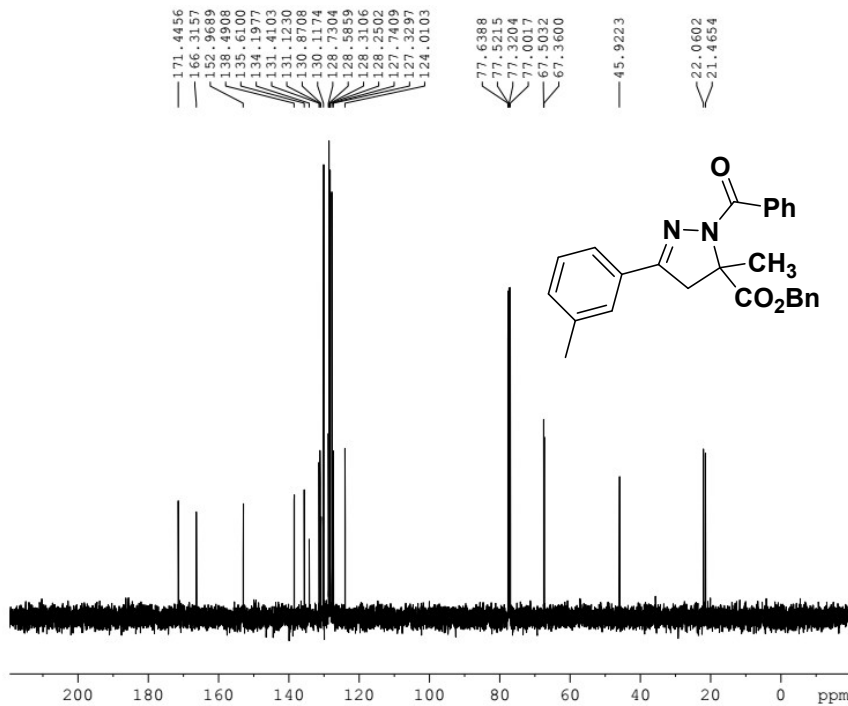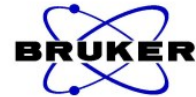

```

NAME lgy20171225-2-c
EXPNO 1
PROCNO 1
Date_ 20171229
Time 9.33
INSTRUM spect
PROBHD 5 mm PABBO BB-
FULPROG zgpg30
TD 65536
SOLVENT CDCl3
NS 66
DS 4
SWH 24038.461 Hz
FIDRES 0.368798 Hz
AQ 1.3631988 sec
RG 203
DE 20.800 usec
TE 294.2 K
D1 2.0000000 sec
D11 0.03000000 sec
TDO 1
  
```

```

----- CHANNEL f1 -----
NUC1 13C
P1 11.50 usec
PL1 -3.00 dB
PL1W 68.16146088 W
SFO1 100.6278593 MHz
  
```

```

----- CHANNEL f2 -----
CPDPRG2 waltz16
NUC2 1H
PCPD2 90.00 usec
PL2 -2.60 dB
PL12 13.88 dB
PL13 14.50 dB
PL2W 17.82643890 W
PL12W 0.40092635 W
PL13W 0.34758785 W
SFO2 400.1516006 MHz
SI 32768
SF 100.6177980 MHz
WDW EM
SSB 0
LB 1.00 Hz
GB 0
PC 1.40
  
```

*Benzyl 1-benzoyl-3-(4-chlorophenyl)-5-methyl-4,5-dihydro-1H-pyrazole-5-*

carboxylate(3h)

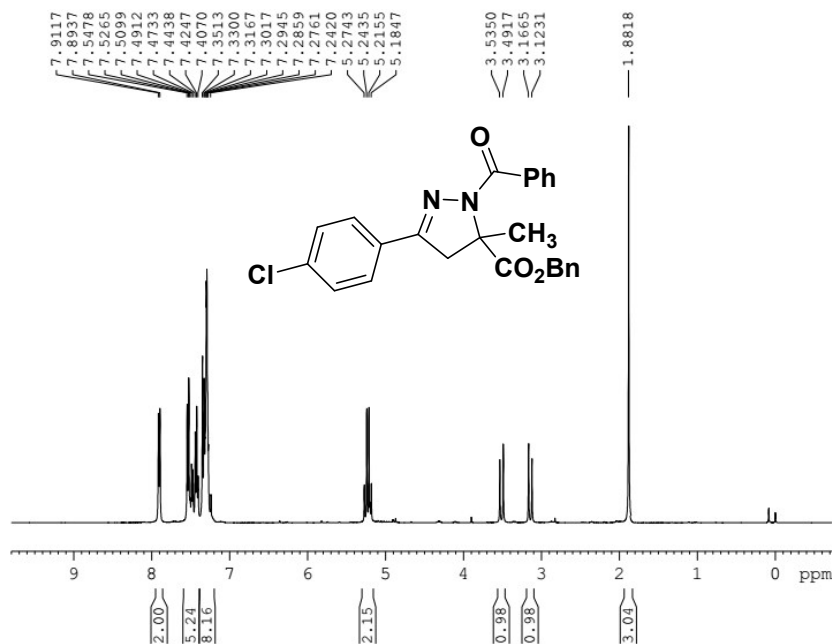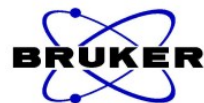

```

NAME      LGY20180105-1-1-H
EXPNO     1
PROCNO    1
Date_     20180306
Time      15.41
INSTRUM   spect
PROBHD    5 mm PABBO BB-
PULPROG   zg30
TD         65536
SOLVENT   CDCl3
NS         8
DS         0
SWH        8223.685 Hz
FIDRES     0.125483 Hz
AQ         3.9846387 sec
RG         181
DW         60.800 usec
DE         6.50 usec
TE         294.7 K
D1         1.00000000 sec
TD0        1

----- CHANNEL f1 -----
NUC1      1H
P1        13.00 usec
PL1       -2.60 dB
PL1W      17.82643890 W
SFO1      400.1524711 MHz
SI        32768
SF        400.1500161 MHz
WDW       EM
SSB       0
LB        0.30 Hz
GB        0
PC        1.00
    
```

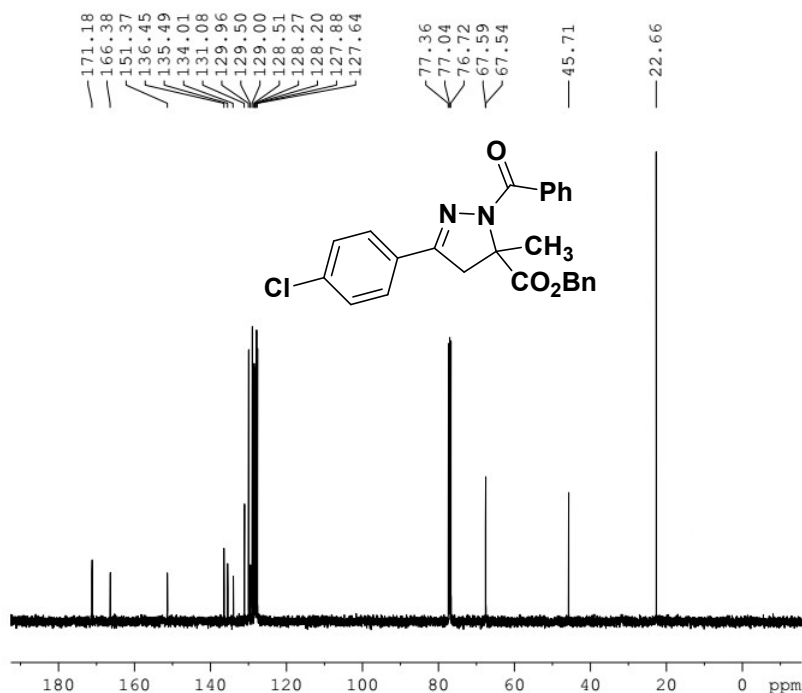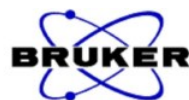

```

NAME      LGY20180403-3Cl-C
EXPNO     1
PROCNO    1
Date_     20180403
Time      15.39
INSTRUM   spect
PROBHD    5 mm PABBO BB-
PULPROG   zgpg30
TD         65536
SOLVENT   CDCl3
NS         97
DS         4
SWH        24038.461 Hz
FIDRES     0.366798 Hz
AQ         1.3631988 sec
RG         203
DW         20.800 usec
DE         6.50 usec
TE         293.9 K
D1         2.00000000 sec
D11        0.03000000 sec
TD0        1

----- CHANNEL f1 -----
NUC1      13C
P1        11.50 usec
PL1       -3.00 dB
PL1W      68.16146088 W
SFO1      100.6278593 MHz

----- CHANNEL f2 -----
CPDPRG2   waltz16
NUC2      1H
PCPD2     90.00 usec
PL2       -2.60 dB
PL12      13.88 dB
PL13      14.50 dB
PL2W      17.82643890 W
PL12W     0.40092635 W
PL13W     0.34758785 W
SFO2      400.1516006 MHz
SI        32768
SF        100.6177980 MHz
WDW       EM
SSB       0
LB        1.00 Hz
GB        0
PC        1.40
    
```

*Benzyl 1-benzoyl-3-(4-fluorophenyl)-5-methyl-4,5-dihydro-1H-pyrazole-5-*

carboxylate(3i)

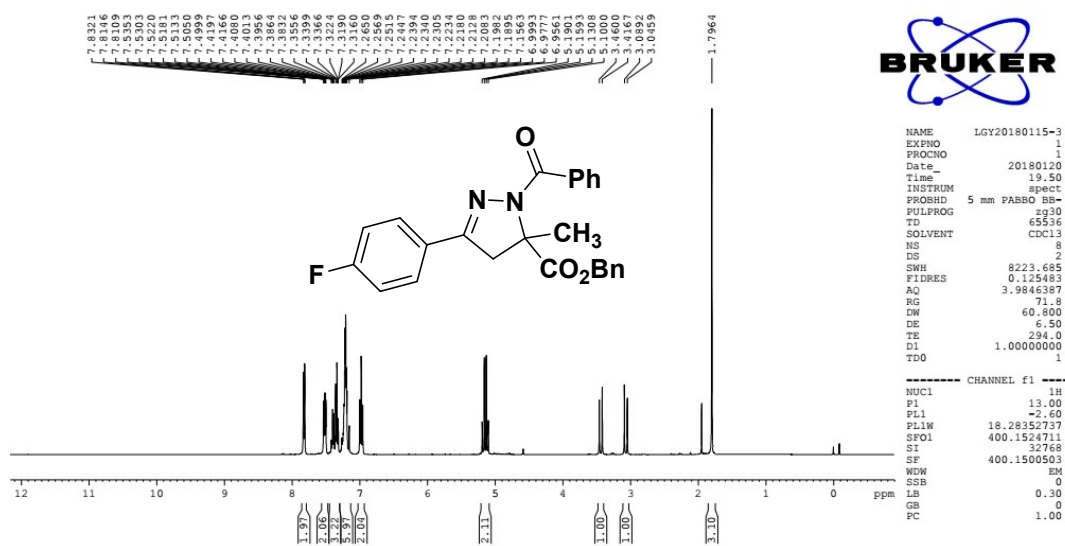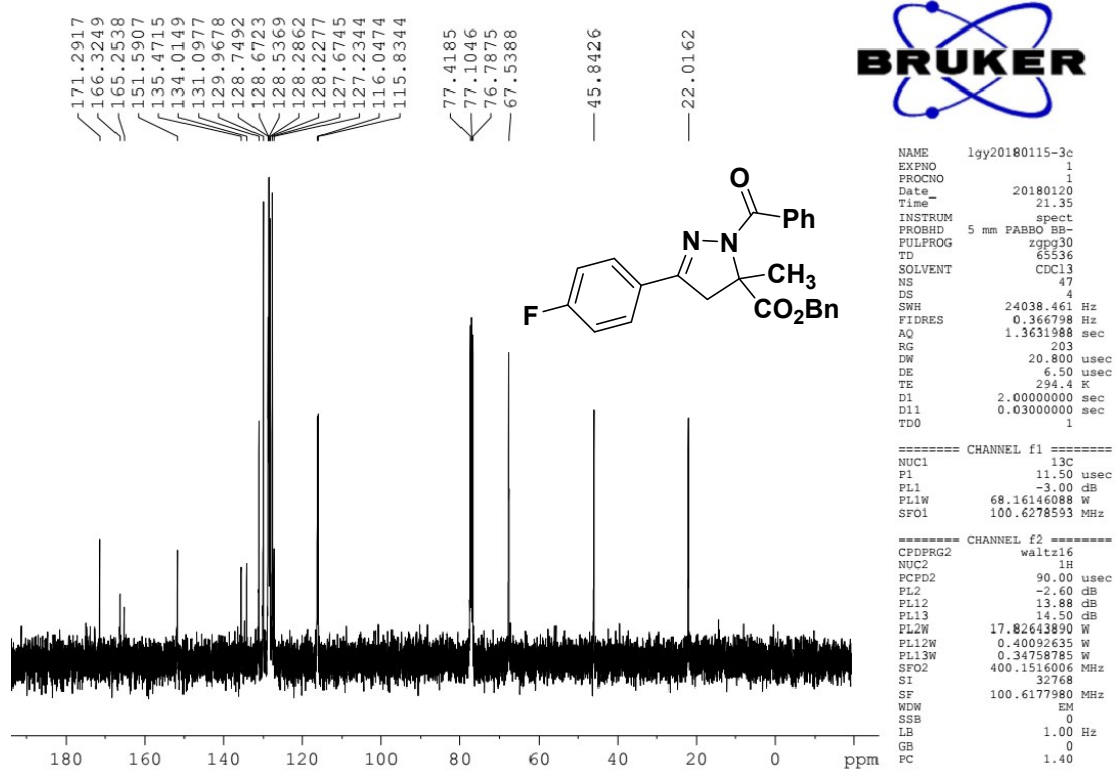

Benzyl 1-benzoyl-3-(4-methoxyphenyl)-5-methyl-4,5-dihydro-1H-pyrazole-5-

carboxylate(3j)

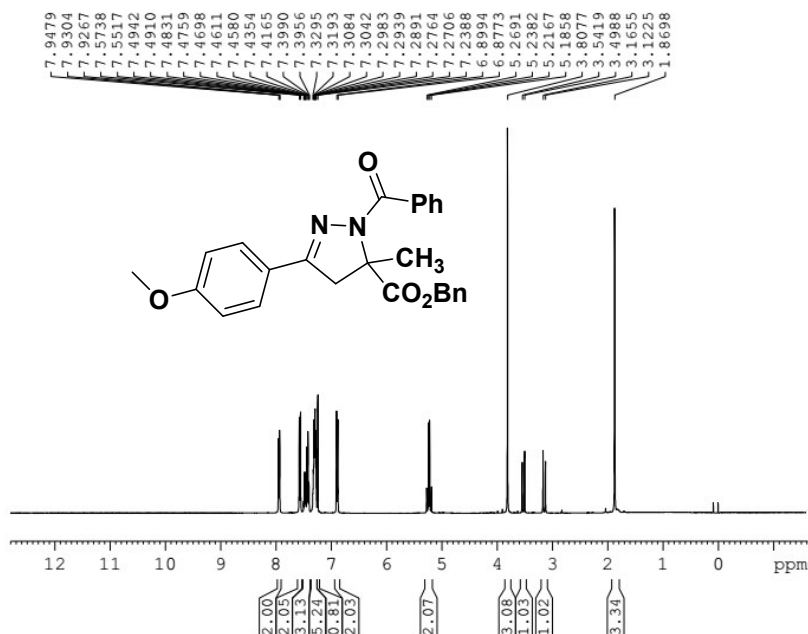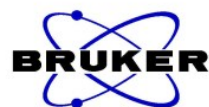

NAME lgy20180105-2-1  
 EXPNO 1  
 PROCNO 1  
 Date\_ 20180106  
 Time 11.53  
 INSTRUM spect  
 PROBHD 5 mm PABBO BB-  
 PULPROG zg30  
 TD 65536  
 SOLVENT CDCl3  
 NS 8  
 DS 2  
 SWH 8223.685 Hz  
 FIDRES 0.125483 Hz  
 AQ 3.9846387 sec  
 RG 50.8  
 DW 60.800 usec  
 DE 6.50 usec  
 TE 293.7 K  
 D1 1.00000000 sec  
 TDO 1

----- CHANNEL f1 -----  
 NUC1 1H  
 P1 13.00 usec  
 PL1 -2.60 dB  
 PL1W 17.82643890 W  
 SFO1 400.1524711 MHz  
 SI 32768  
 SF 400.1500172 MHz  
 WDW EM  
 SSB 0  
 LB 0.30 Hz  
 GB 0  
 PC 1.00

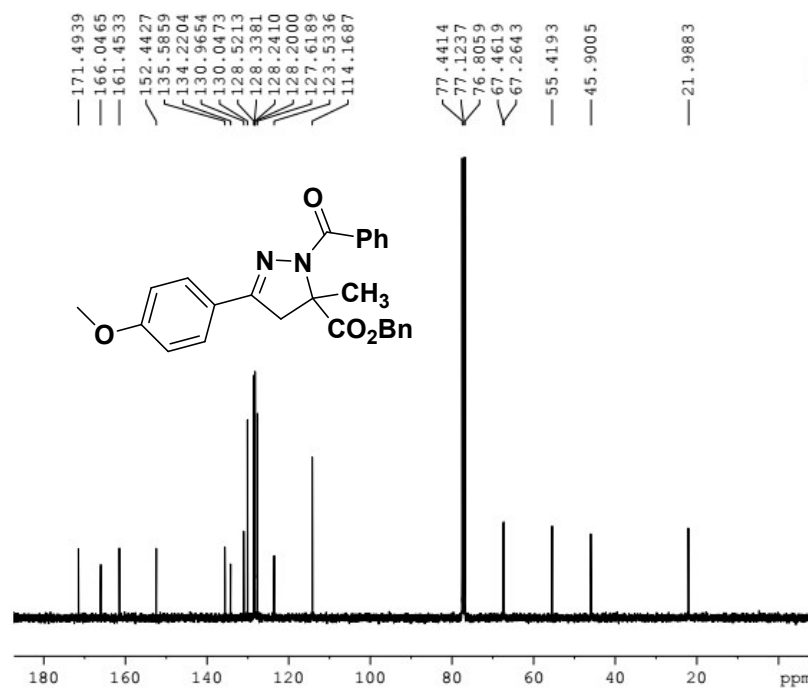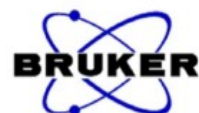

EXPNO 1  
 PROCNO 1  
 Date\_ 20180106  
 Time 12.53  
 INSTRUM spect  
 PROBHD 5 mm PABBO BB-  
 PULPROG zgpg30  
 TD 65536  
 SOLVENT CDCl3  
 NS 1024  
 DS 4  
 SWH 24038.461 Hz  
 FIDRES 0.366798 Hz  
 AQ 1.3631988 sec  
 RG 203  
 DW 20.800 usec  
 DE 6.50 usec  
 TE 295.6 K  
 D1 2.00000000 sec  
 D11 0.03000000 sec  
 TDO 1

----- CHANNEL f1 -----  
 NUC1 13C  
 P1 11.50 usec  
 PL1 -3.00 dB  
 PL1W 68.1614608 W  
 SFO1 100.6278553 MHz

----- CHANNEL f2 -----  
 CPROG2 waltz16  
 NUC2 1H  
 PCPD2 90.00 usec  
 PL2 -2.60 dB  
 PL12 13.88 dB  
 PL13 14.50 dB  
 PL2W 17.82643890 W  
 PL12W 0.40092635 W  
 PL13W 0.34758785 W  
 SFO2 400.1516006 MHz  
 SI 32768  
 SF 100.6177980 MHz  
 WDW EM  
 SSB 0  
 LB 1.00 Hz  
 GB 0  
 PC 1.40

Benzyl 1-benzoyl-5-methyl-3-(4-nitrophenyl)-4,5-dihydro-1H-pyrazole-5-

**carboxylate(3k)**

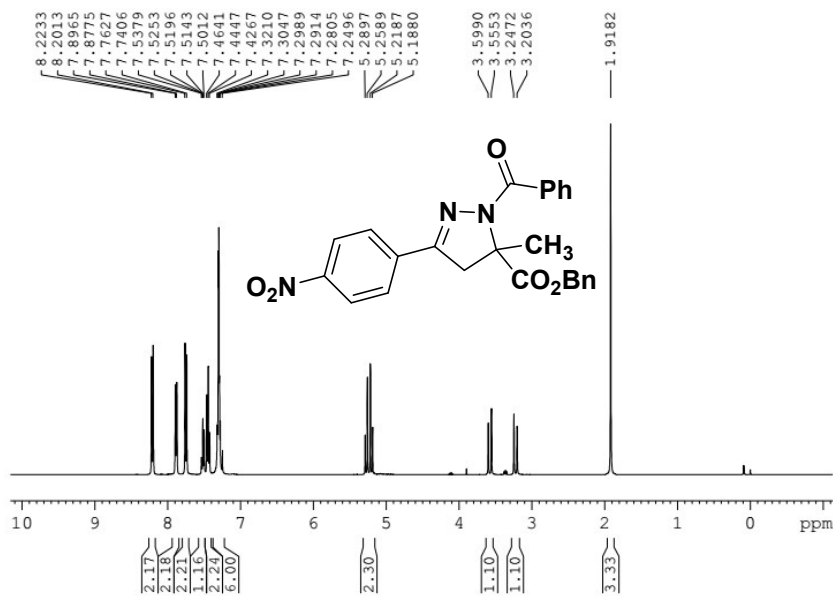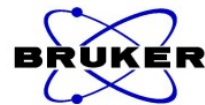

```

NAME      lgy20171228-5
EXPNO    1
PROCNO    1
Date_     20171228
Time      21.44
INSTRUM   spect
PROBHD    5 mm PABBO BB-
PULPROG   zg30
TD         65536
SOLVENT   CDCl3
NS         8
DS         2
SWH        8223.685 Hz
FIDRES     0.125483 Hz
AQ         3.9846387 sec
RG         57
DW         60.800 usec
DE         6.50 usec
TE         297.2 K
D1         1.00000000 sec
TDO        1
    
```

```

----- CHANNEL f1 -----
NUC1      1H
P1        13.00 usec
PL1       -2.60 dB
PL1W      17.82643890 W
SFO1      400.1524711 MHz
SI        32768
SF         400.1500125 MHz
WDW        EM
SSB         0
LB         0.30 Hz
GB         0
PC         1.00
    
```

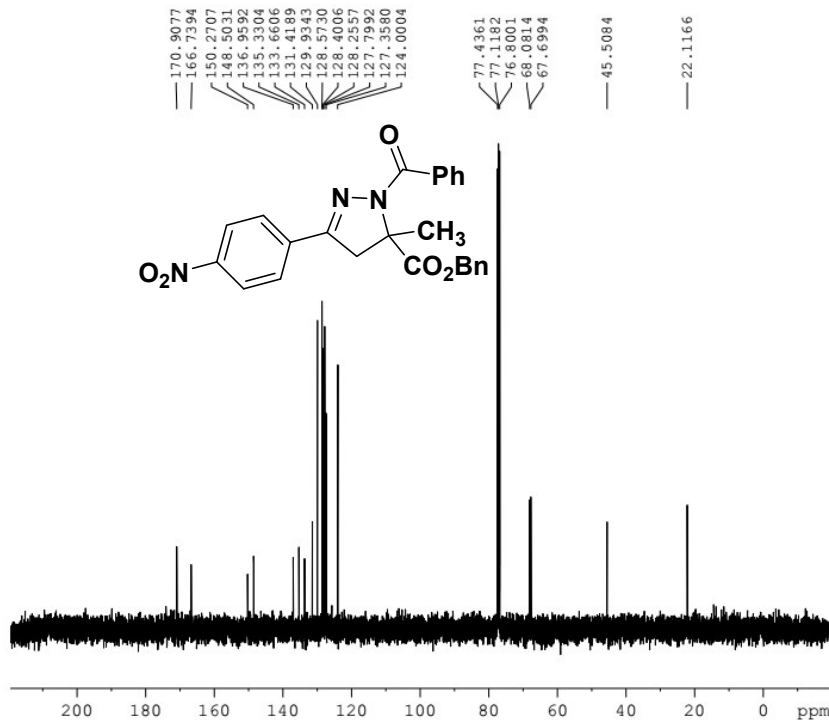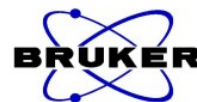

```

NAME      lgy20171228-5-C
EXPNO    1
PROCNO    1
Date_     20171228
Time      21.49
INSTRUM   spect
PROBHD    5 mm PABBO BB-
PULPROG   zgpg30
TD         65536
SOLVENT   CDCl3
NS         75
DS         4
SWH        24038.461 Hz
FIDRES     0.366798 Hz
AQ         1.3631988 sec
RG         203
DW         20.800 usec
DE         6.50 usec
TE         298.0 K
D1         2.00000000 sec
D11        0.03000000 sec
TDO        1
    
```

```

----- CHANNEL f1 -----
NUC1      13C
P1        11.50 usec
PL1       -3.00 dB
PL1W      68.16146088 W
SFO1      100.6278593 MHz

----- CHANNEL f2 -----
CPDPRG2   waltz16
NUC2      1H
PCPD2     90.00 usec
PL2       -2.60 dB
PL12      13.88 dB
PL13      14.50 dB
PL12W     17.82643890 W
PL12W     0.40092635 W
PL13W     0.34758785 W
SFO2      400.1516006 MHz
SI        32768
SF         100.6177980 MHz
WDW        EM
SSB         0
LB         1.00 Hz
GB         0
PC         1.40
    
```

**Benzyl 1-benzoyl-5-methyl-3-(p-tolyl)-4,5-dihydro-1H-pyrazole-5-carboxylate(3l)**



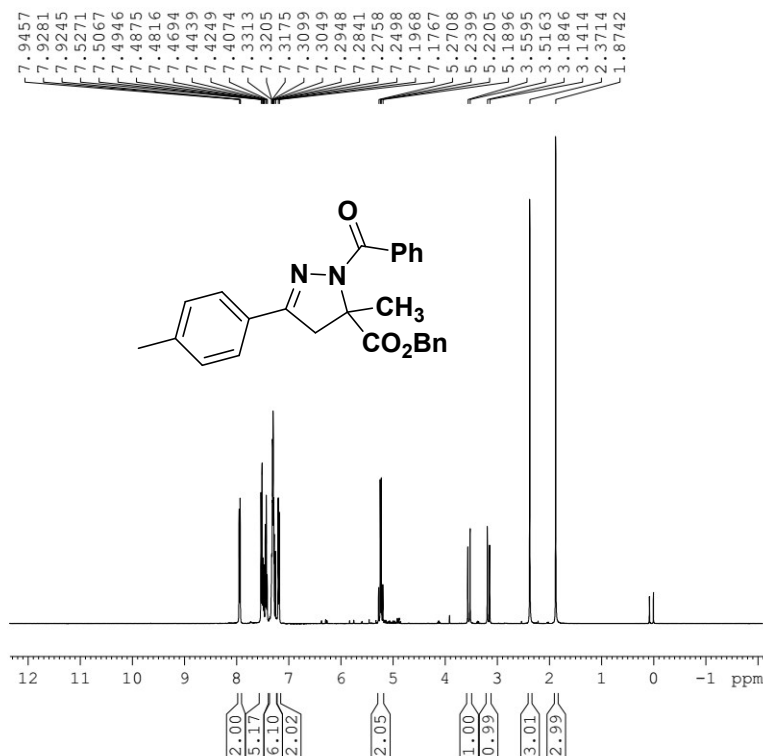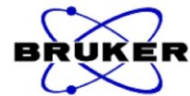

```

NAME      LGY-4CH3-H
EXPNO     1
PROCNO    1
Date_     20180306
Time      15.46
INSTRUM   spect
PROBHD    5 mm FAPBO BB-
PULPROG   zg30
TD         65536
SOLVENT   CDCl3
NS         8
DS         0
SWH       8223.685 Hz
FIDRES    0.125483 Hz
AQ         3.9846387 sec
RG         203
DW         60.800 usec
DE         6.50 usec
TE         294.6 K
D1         1.00000000 sec
TDO        1
----- CHANNEL f1 -----
NUC1      1H
P1        13.00 usec
PL1       -2.60 dB
PL1W      17.82643890 W
SF01      400.1524711 MHz
SI        32768
SF        400.1500131 MHz
WDW       EM
SSB       0
LB        0.30 Hz
GB        0
PC        1.00

```

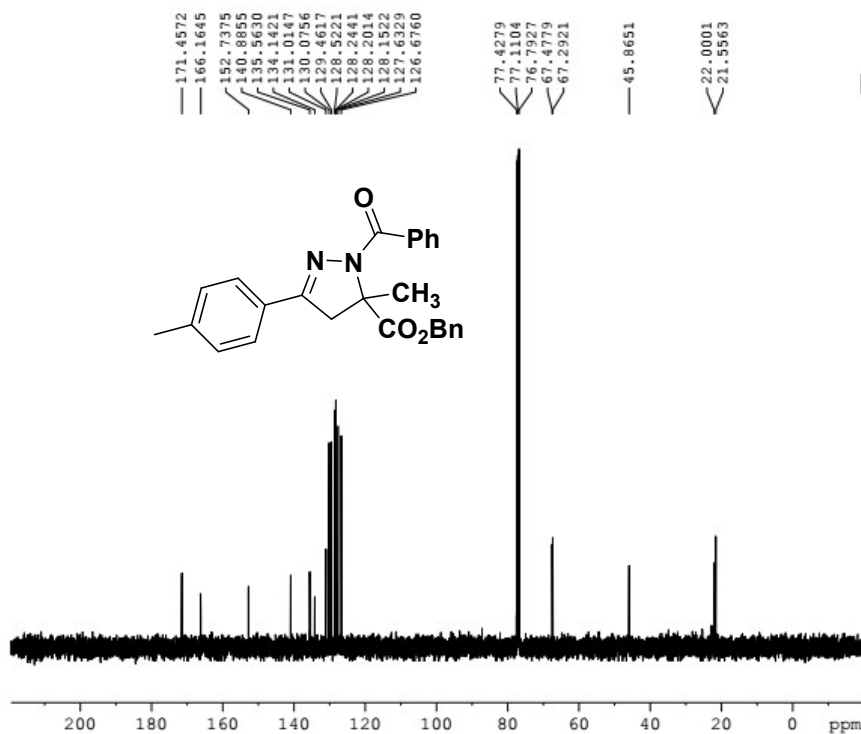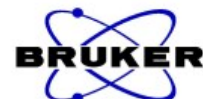

```

NAME      lgy20171227-3-c
EXPNO     1
PROCNO    1
Date_     20171229
Time      18.51
INSTRUM   spect
PROBHD    5 mm FAPBO BB-
PULPROG   zgpg30
TD         65536
SOLVENT   CDCl3
NS         174
DS         4
SWH       24038.461 Hz
FIDRES    0.366798 Hz
AQ         1.3631988 sec
RG         203
DW         20.800 usec
DE         6.50 usec
TE         294.2 K
D1         2.00000000 sec
D11        0.03000000 sec
TDO        1
----- CHANNEL f1 -----
NUC1      13C
P1        11.50 usec
PL1       -3.00 dB
PL1W      68.16146088 W
SF01      100.6278593 MHz
----- CHANNEL f2 -----
CPDPRG2   waltz16
NUC2       1H
PCPD2     90.00 usec
PL2       -2.60 dB
PL12      13.88 dB
PL13      14.50 dB
PL2W      17.82643890 W
PL12W     0.40092635 W
PL13W     0.34758785 W
SF02      400.1516006 MHz
SI        32768
SF        100.6177980 MHz
WDW       EM
SSB       0
LB        1.00 Hz
GB        0
PC        1.40

```

*Ethyl 1-benzoyl-5-methyl-3-phenyl-4,5-dihydro-1H-pyrazole-5-carboxylate(3p)*





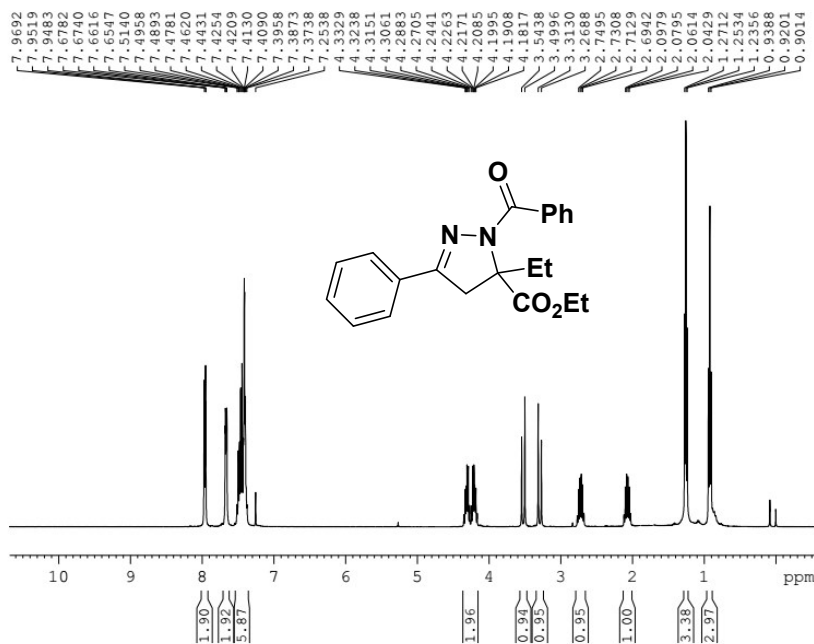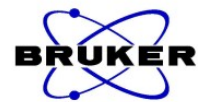

```

NAME      LGY20180109-7-7
EXPNO     1
PROCNO    1
Date_     20180306
Time      15.37
INSTRUM   spect
PROBHD    5 mm PABBO BB-
PULPROG   zg30
TD         65536
SOLVENT   CDCl3
NS         8
DS         0
SWH        8223.685 Hz
FIDRES     0.125483 Hz
AQ         3.9846387 sec
RG         181
DW         60.800 usec
DE         6.50 usec
TE         294.6 K
D1         1.00000000 sec
TDO        1
  
```

```

----- CHANNEL f1 -----
NUC1      1H
P1        13.00 usec
PL1       -2.60 dB
PLLW      17.82643890 W
SFO1      400.1524711 MHz
SI        32768
SF        400.1500113 MHz
WDW       EM
SSB       0
LB        0.30 Hz
GB        0
PC        1.00
  
```

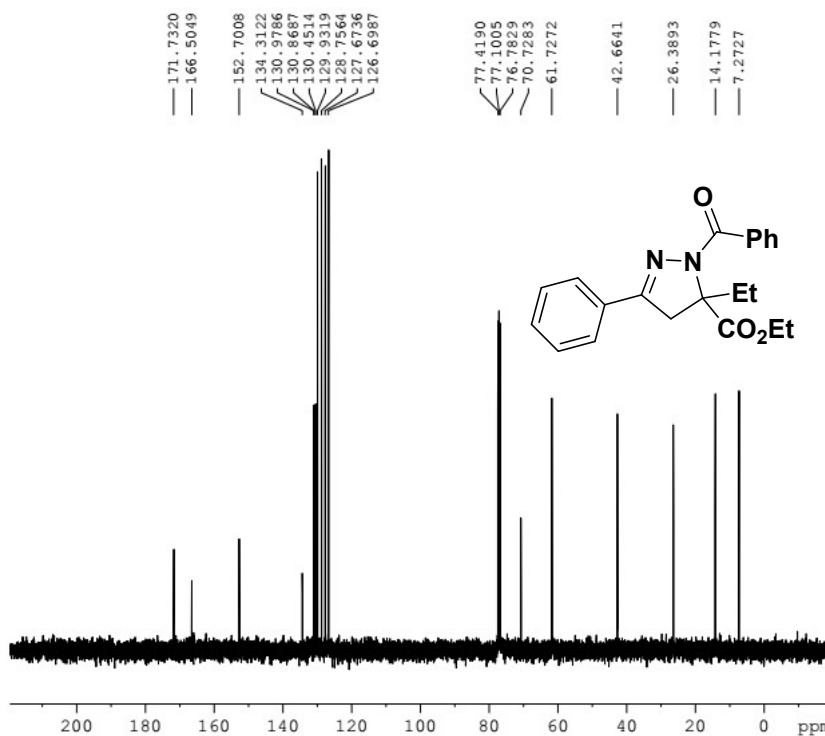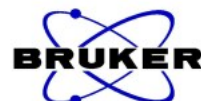

```

NAME      LGY20180109-7-7-c
EXPNO     1
PROCNO    1
Date_     20180306
Time      16.10
INSTRUM   spect
PROBHD    5 mm PABBO BB-
PULPROG   zgpg30
TD         65536
SOLVENT   CDCl3
NS         36
DS         4
SWH        24038.461 Hz
FIDRES     0.366798 Hz
AQ         1.3631988 sec
RG         203
DW         20.800 usec
DE         6.50 usec
TE         295.6 K
D1         2.00000000 sec
D11        0.03000000 sec
TDO        1
  
```

```

===== CHANNEL f1 =====
NUC1      13C
P1        11.50 usec
PL1       -3.00 dB
PLLW      68.16146088 W
SFO1      100.6278593 MHz
  
```

```

===== CHANNEL f2 =====
CPDPRG2   waltz16
NUC2      1H
PCPD2     90.00 usec
PL2       -2.60 dB
PL12      13.88 dB
PL13      14.50 dB
PL2W      17.82643890 W
PL12W     0.40092635 W
PL13W     0.34758785 W
SFO2      400.1516006 MHz
SI        32768
SF        100.6177980 MHz
WDW       EM
SSB       0
LB        1.00 Hz
GB        0
PC        1.40
  
```

*N'*-(2-chloro-1-(2-fluorophenyl)ethylidene)benzohydrazide(1c)

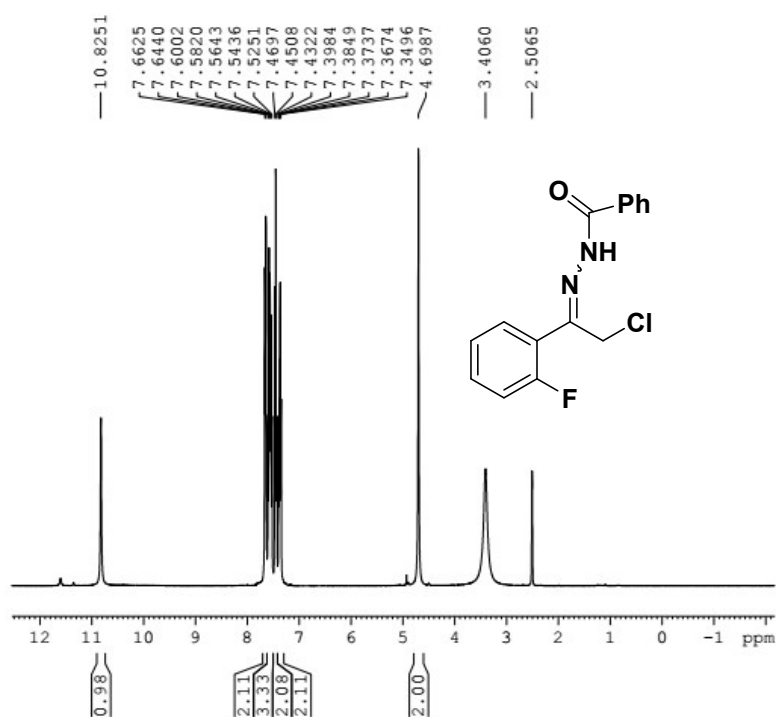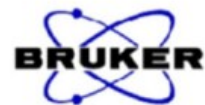

```

NAME      lgy-20180403-2-F-YL
EXPNO    1
PROCNO   1
Date_    20180403
Time     16.27
INSTRUM  spect
PROBHD   5 mm PABBO BB-
PULPROG  zg30
TD       65536
SOLVENT  DMSO
NS       16
DS       2
SWH      8223.685 Hz
FIDRES   0.125483 Hz
AQ       3.9846387 sec
RG       161
DW       60.800 usec
DE       6.50 usec
TE       299.0 K
D1       1.00000000 sec
D11      1
TD0      1
  
```

```

----- CHANNEL f1 -----
NUC1     1H
P1       13.00 usec
PL1      -2.60 dB
PL1W    17.82643890 W
SFO1    400.1524711 MHz
SI       32768
SF       400.1500000 MHz
WDW      EM
SSB      0
LB       0.30 Hz
GB       0
PC       1.00
  
```

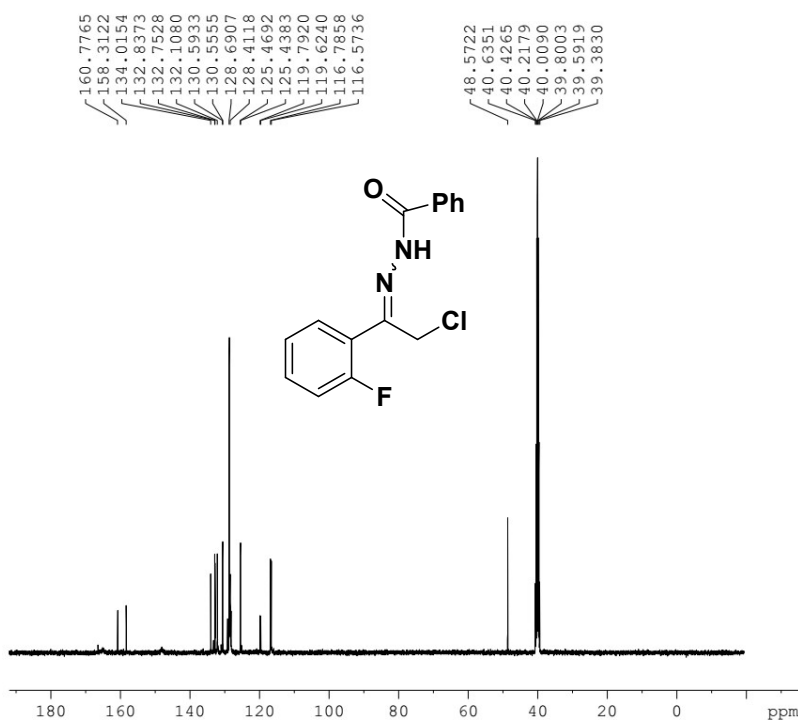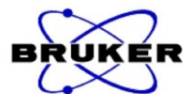

```

NAME      lgy-20180403-2-F-YL-C-1
EXPNO    1
PROCNO   1
Date_    20180403
Time     16.56
INSTRUM  spect
PROBHD   5 mm PABBO BB-
PULPROG  zgpg30
TD       65536
SOLVENT  DMSO
NS       370
DS       4
SWH      24038.461 Hz
FIDRES   0.366798 Hz
AQ       1.3631988 sec
RG       203
DW       20.800 usec
DE       6.50 usec
TE       300.6 K
D1       2.00000000 sec
D11      0.03000000 sec
TD0      1
  
```

```

----- CHANNEL f1 -----
NUC1     13C
P1       11.50 usec
PL1      -3.00 dB
PL1W    68.16146098 W
SFO1    100.6278593 MHz

----- CHANNEL f2 -----
CPDPRG2  waltz16
NUC2     1H
PCPD2    90.00 usec
PL2      -2.60 dB
PL12    13.88 dB
PL13    14.50 dB
PL1W    17.82643890 W
PL12W   0.40092635 W
PL13W   0.34758785 W
SFO2    400.1516006 MHz
SI       32768
SF       100.6177980 MHz
WDW      EM
SSB      0
LB       1.00 Hz
GB       0
PC       1.40
  
```

*N'*-(2-chloro-1-(3-methoxyphenyl)ethylidene)benzohydrazide (1f)

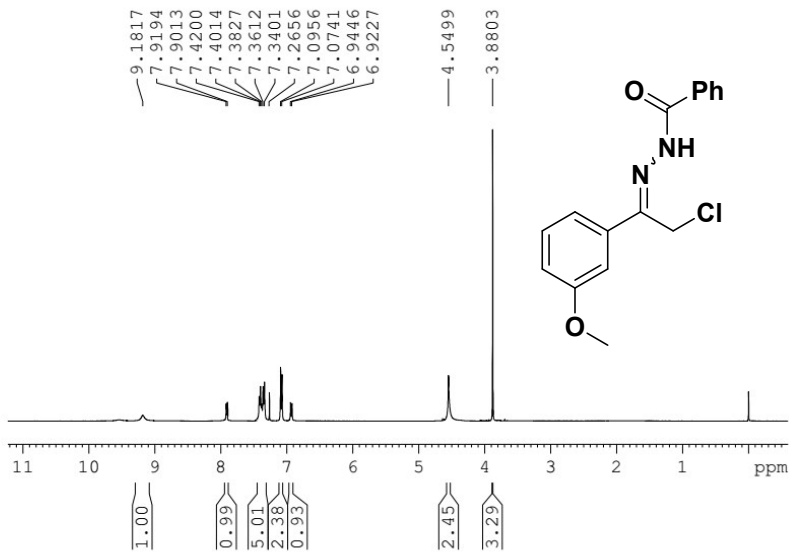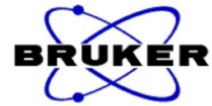

```

NAME          LGY-4-OMe-H
EXPNO         1
PROCNO        1
Date_         20180504
Time          11.12
INSTRUM       spect
PROBHD        5 mm PABBO BB-
PULPROG       zg30
TD            65536
SOLVENT       CDCl3
NS            8
DS            2
SWH           8223.685 Hz
FIDRES        0.125483 Hz
AQ            3.9846387 sec
RG            161
DW            60.800 usec
DE            6.50 usec
TE            300.4 K
D1            1.00000000 sec
D11           1
TD0           1
  
```

```

===== CHANNEL f1 =====
NUC1          1H
P1            13.00 usec
PL1           -2.60 dB
PL1W         18.28352737 W
SFO1         400.1524711 MHz
SI            32768
SF            400.1500065 MHz
WDW           EM
SSB           0
LB            0.30 Hz
GB            0
PC            1.00
  
```

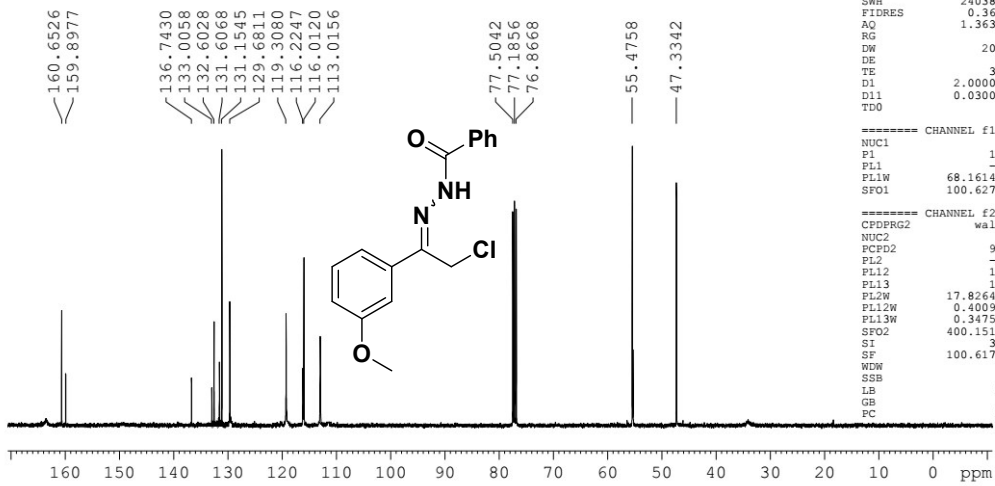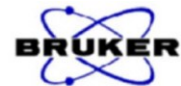

```

NAME          lgy-20180420-c-1
EXPNO         1
PROCNO        1
Date_         20180420
Time          17.52
INSTRUM       spect
PROBHD        5 mm PABBO BB-
PULPROG       zg30
TD            65536
SOLVENT       CDCl3
NS            4
DS            4
SWH           24038.461 Hz
FIDRES        0.366798 Hz
AQ            1.3631988 sec
RG            203
DW            20.800 usec
DE            6.50 usec
TE            302.1 K
D1            2.00000000 sec
D11           0.03000000 sec
TD0           1
  
```

```

===== CHANNEL f1 =====
NUC1          13C
P1            11.50 usec
PL1           -3.00 dB
PL1W         68.16146088 W
SFO1         100.6278593 MHz
  
```

```

===== CHANNEL f2 =====
CPDPRG2       waltz16
NUC2          1H
PCPD2         90.00 usec
PL2           -2.60 dB
PL12          13.88 dB
PL13          14.50 dB
PL2W         17.82643890 W
PL12W        0.40092635 W
PL13W        0.34758785 W
SFO2         400.1516006 MHz
SI            32768
SF            100.6177980 MHz
WDW           EM
SSB           0
LB            1.00 Hz
GB            0
PC            1.40
  
```
